RESEARCH ARTICLE

# Systematic review on biomechanical effects of high-velocity, low amplitude spinal manipulation

Anke Langenfeld<sup>1\*†</sup>, Mirjam Baechler<sup>2†</sup>, Jaap Swanenburg<sup>1,3</sup>, Malin Mühlemann<sup>1</sup>, Luana Nyirö<sup>1,2</sup>, Daniel Streuli<sup>1</sup>, Brigitte Wirth<sup>1</sup>, Petra Schweinhardt<sup>1,2</sup>

**1** Integrative Spinal Research Group, Department of Chiropractic Medicine, University Hospital Balgrist and University of Zurich, Zurich, Switzerland, **2** Department of Chiropractic Medicine, University Hospital Balgrist and University of Zurich, Zurich, Switzerland, **3** Faculty of Medicine, Institute of Aerospace Medicine, University of Zurich, Zurich, Switzerland

† These authors share first authorship on this work.

\* [anke.langenfeld@balgrist.ch](mailto:anke.langenfeld@balgrist.ch)

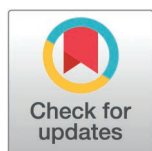

## Abstract

### Background

Spinal manipulative therapy uses high-velocity low-amplitude (HVLA) thrusts which are clinically effective, but underlying mechanisms are still unknown.

### Objective

To summarize the evidence for biomechanical effects of HVLA thrusts in asymptomatic and symptomatic humans as well as for a possible link between biomechanical effects and clinical effectiveness.

### Study design

Systematic review of randomized controlled trials.

### Methods

An information specialist conducted systematic literature searches in six databases [Medline (OvidSP), Premedline (PubMed), CINAHL, EMBASE, Cochrane, and Bio-sis]. Studies were selected by two authors and classified using the revised Cochrane risk-of-bias tool for randomized trials (RoB 2). Results were qualitatively summarized per biomechanical output [range of motion (ROM) according to the spinal region where HVLA thrusts were applied, facet joint gapping, and spinal stiffness].

### Results

The thirty-three included studies were heterogeneous regarding participant characteristics, intervention frequency and outcomes. Twenty-seven studies reported on the effects of HVLA thrusts on spinal ROM. There is evidence increased cervical ROM

## OPEN ACCESS

**Citation:** Langenfeld A, Baechler M, Swanenburg J, Mühlemann M, Nyirö L, Streuli D, et al. (2025) Systematic review on biomechanical effects of high-velocity, low amplitude spinal manipulation. PLoS One 20(7): e0328048. <https://doi.org/10.1371/journal.pone.0328048>

**Editor:** Anthony Demont, National Institute of Health and Medical Research: INSERM, FRANCE

**Received:** November 9, 2023

**Accepted:** June 25, 2025

**Published:** July 18, 2025

**Copyright:** © 2025 Langenfeld et al. This is an open access article distributed under the terms of the [Creative Commons Attribution License](https://creativecommons.org/licenses/by/4.0/), which permits unrestricted use, distribution, and reproduction in any medium, provided the original author and source are credited.

**Data availability statement:** All relevant data are within the manuscript and its [Supporting Information](#) files.

**Funding:** The author(s) received no specific funding for this work.

**Competing interests:** The authors have declared that no competing interest exist.

following cervical HVLA thrusts on cervical ROM [9/15 studies with a positive treatment effect (5 low risk of bias/4 some concern) and increased cervical ROM following thoracic HVLA thrusts [8/8 studies (4 low risk of bias/4 some concern)]. The effects of a thoracic and lumbar HVLA thrusts on the respective ROM were less clear. Three (2 low risk/1 some concern) studies on facet joint gapping showed increased gapping following HVLA thrusts compared to side-posture positioning, and a single study (some concern) on spinal stiffness showed no effect of HVLA thrusts. Only one study (some concern) linked the biomechanical to clinical outcomes.

## Conclusion

HVLA thrusts, either applied to the cervical or the thoracic spine, appear to increase cervical ROM, based on studies with low risk and studies with some concern regarding risk of bias. For all other outcomes, the included studies were too heterogeneous and too few to draw any sound conclusion. Future studies on the biomechanical effects of HVLA thrusts should link the biomechanical to clinical outcomes such as pain and disability.

## PROSPERO registration

CRD42018096963.

## Introduction

High-velocity, low-amplitude (HVLA) thrusts are widely used by chiropractors, physical therapists, osteopaths, and medical doctors [1]. SMT using HVLA thrusts are thought to be clinically effective and is recommended in recent guidelines for the management of acute and chronic low back pain (LBP) [2], neck pain [3], cervical [4], and lumbar radiculopathy [5]. The effects of HVLA thrusts on pain and function in patients with neck and LBP are comparable to other recommended treatment options, like medication and exercise [6–8].

HVLA thrusts can be applied manually, by a hand-held instrument (instrument-applied manipulation, IAM), or by a robot-like apparatus [9,10]. The manual procedure is characterized by a force application through the hands of the practitioner directed to the intervertebral joints [11–13]. The target joint is brought to the end of its range of motion (ROM) by the application of a preload force, followed by a high-velocity thrust over a short-amplitude [9,14]. This application targets the intervertebral joint but the forces are also transmitted to the surrounding soft tissues [15]. For IAM, which is clinically effective and safe, a force is delivered to the spine by a spring-loaded hand-held instrument with a small rubber tip [16]. For research, a robot-like apparatus has been developed that can apply a thrust to the human spine in a standardized manner with different force-time profile settings [10].

The effects of HVLA thrusts have been categorized as neurophysiological or biomechanical, e.g., increased range of motion, or reduced muscle activity, with the overall effects being most likely a complex interplay between the two [15,17,18].

Previous systematic reviews have investigated the biomechanical effects of HVLA thrusts directed to the cervical or thoracic spine on cervical range of motion (ROM) [19–21]. HVLA thrusts directed to the cervical or thoracic spine were shown to increase cervical ROM [19–21]. In contrast, systematic reviews on lumbar HVLA thrusts found no effect on lumbar ROM [19]. No review has examined the effects of thoracic HVLA thrusts on thoracic ROM or other biomechanical outcomes. Additionally, information linking biomechanical effects of HVLA thrusts to clinical outcome is missing [1,9].

Therefore, this systematic review aimed to summarize the evidence for biomechanical effects of an HVLA thrusts in asymptomatic and symptomatic humans as well as to explore a possible link between these biomechanical effects and clinical effectiveness.

## Materials and methods

This systematic review is reported in accordance with the Preferred Reporting Items of Systematic Review and Meta-Analysis guidelines [22]. The protocol of this systematic review was registered at the International Prospective Register of Systematic Reviews (PROSPERO: CRD42018096963).

### Search strategy

An a priori search strategy was agreed on at the beginning of the project by three of the authors (DS, PS, BW). The initial literature search was undertaken by an information specialist at the University of Zurich, Zurich, Switzerland. All articles published until June 14, 2018, were included. No time restriction regarding the start date was applied. The literature search was updated three times for the times June 2018 – October 2020, October 2020 – March 2023 and March 2023 – November 2024 by the same information specialist using the same search strategy (see appendix). Databases were Medline, CINAHL, EMBASE, PubMed, Cochrane, and Biosis.

### Inclusion and exclusion criteria

This review focused on peer-reviewed publications reporting on randomized controlled trials in English that investigated biomechanical effects, changes in ROM, changes in the distance between articular surfaces of the zygapophyseal joint [gapping] [23], and resistance to elastic deformation of a joint (stiffness) [24], following manual, instrumented, or apparatus HVLA thrust in symptomatic or asymptomatic humans.

Studies exclusively reporting neurophysiological or subjective outcomes or using any modeling, such as finite element models, were excluded. The review included studies that used HVLA thrusts either as a standalone or combined intervention, provided that the effect of the HVLA thrusts could be isolated [e.g., HVLA thrusts plus electrotherapy versus electrotherapy alone]. Studies involving mobilization were included when mobilization was used as a control intervention against HVLA thrusts. Since the key difference between mobilization and HVLA thrusts is the application of a thrust, mobilization is considered an appropriate control intervention.

### Study selection

After removing duplicate articles, two reviewers independently screened titles and abstracts to determine eligibility. If eligibility could not be determined, the full text was consulted. If articles were deemed eligible during abstract and title screening, the full text was assessed, and data was extracted if included in the review. Discrepancies were resolved through discussion between the two reviewers. If discrepancies could not be resolved, a third reviewer (PS) was consulted.

### Risk of bias assessment

The revised Cochrane risk-of-bias tool for randomized trials (RoB 2, beta version, 15 March 2019) was used to assess the quality of the included studies in five bias categories, i.e., randomization process, deviations from intended interventions,

missing outcome data, outcome measurement, and selection of reported results, as well as an overall bias classification. Each of the categories allows for a classification of 'low risk', 'some concerns', or 'high risk' [25]. Two reviewers from the pool [all listed authors] were randomly allocated to studies and independently classified each study, and discrepancies in any of the bias categories were resolved through discussion between the two reviewers. If a consensus could not be reached, a third reviewer (PS) was involved. To determine the best evidence, studies deemed 'high risk' were excluded from the narrative synthesis.

## Data extraction

Data to be extracted was defined prior to the study and included subject characteristics, treatment region, description of intervention and control interventions, timing of assessment relative to intervention, biomechanical outcomes, and main biomechanical results. Extracted data was verified by a second researcher and summarized per biomechanical output (range of motion (ROM) according to the spinal region where HVLA thrust was applied, facet joint gapping, and spinal stiffness).

## Results

### Study selection and study quality

Titles and abstracts were screened based on predefined inclusion and exclusion criteria by two independent reviewers. The PRISMA flowchart outlines the selection process (Fig 1). A total of 4,228 studies were identified, 1,714 (40.5%) duplicate records were removed, 2,514 (59.4%) records were screened, and 2,376 (56.1%) records were excluded. The remaining 138 (3.2%) full-text articles were assessed, leading to the exclusion of 94 (2.2%) studies. The assessment of study quality resulted in 16 (0.3%) articles with 'low risk' [26–41], 17 (0.4%) articles with 'some concerns' (Fig 1), and 11 articles (0.2%) with 'high risk' [42–52]. The level of agreement of 'high risk' (excluded studies) vs 'low risk' or 'some concerns' (included studies) was moderate ( $\kappa=0.58$ ). A quantitative analysis (meta-analysis) was not performed due to the high heterogeneity of data with regard to participant characteristics, intervention frequency, and outcomes.

Thus, after the exclusion of the high-risk publications, 33 publications were included in the qualitative synthesis (Fig 2).

The majority of the included studies (27/33) reported on the effects of HVLA thrusts on spinal ROM. These effects can be categorized as *local* effects where HVLA thrusts are applied in the same spinal region in which ROM is measured or *regional* effects where HVLA thrusts are applied in a region distant to where ROM is measured. Four studies reported on the effects of HVLA thrusts on gapping of the zygapophyseal [facet] joints [26,27,53] and one on spinal stiffness [54]. Post-treatment measurement time points varied. Eighteen (54%) studies performed measurements pre-treatment and immediately post-treatment [28,29,32–35,37–40,55–62]. Other studies measured 24 hours after treatment [61], 48 hours after treatment [31], one week after treatment [41], after the fifth visit [54], or at the end of each treatment phase [36]. Additionally, if treatment was applied over a period of time, measurements were taken at the end of the treatment series [37,63] (Tables 1–3).

### Local effects of HVLA thrusts on ROM

**Effects of cervical HVLA thrusts on cervical ROM.** 16 (47%) studies investigated the effects of cervical HVLA thrust on cervical ROM in different patient populations, e.g., mechanical neck pain, chronic neck pain, and tension-type headache [32–36,39,41,55–60,64–66]. Seven studies (43.7%) were rated low risk and nine (56.2%) as some concerns [55–60,64–66]. Nine (56.2%) of these studies showed an increase in cervical range of motion (4 low-risk and 5 some concerns) [32,33,39,41,55,56,58,60,64]. Included studies were heterogeneous in terms of the movement planes considered, number of movement planes where an improvement was observed, treatment frequency, and time of measurement after HVLA thrust: treatment approaches ranged from one session with immediate post-treatment measurement to a maximum of eight sessions over four weeks [60] (Table 1).

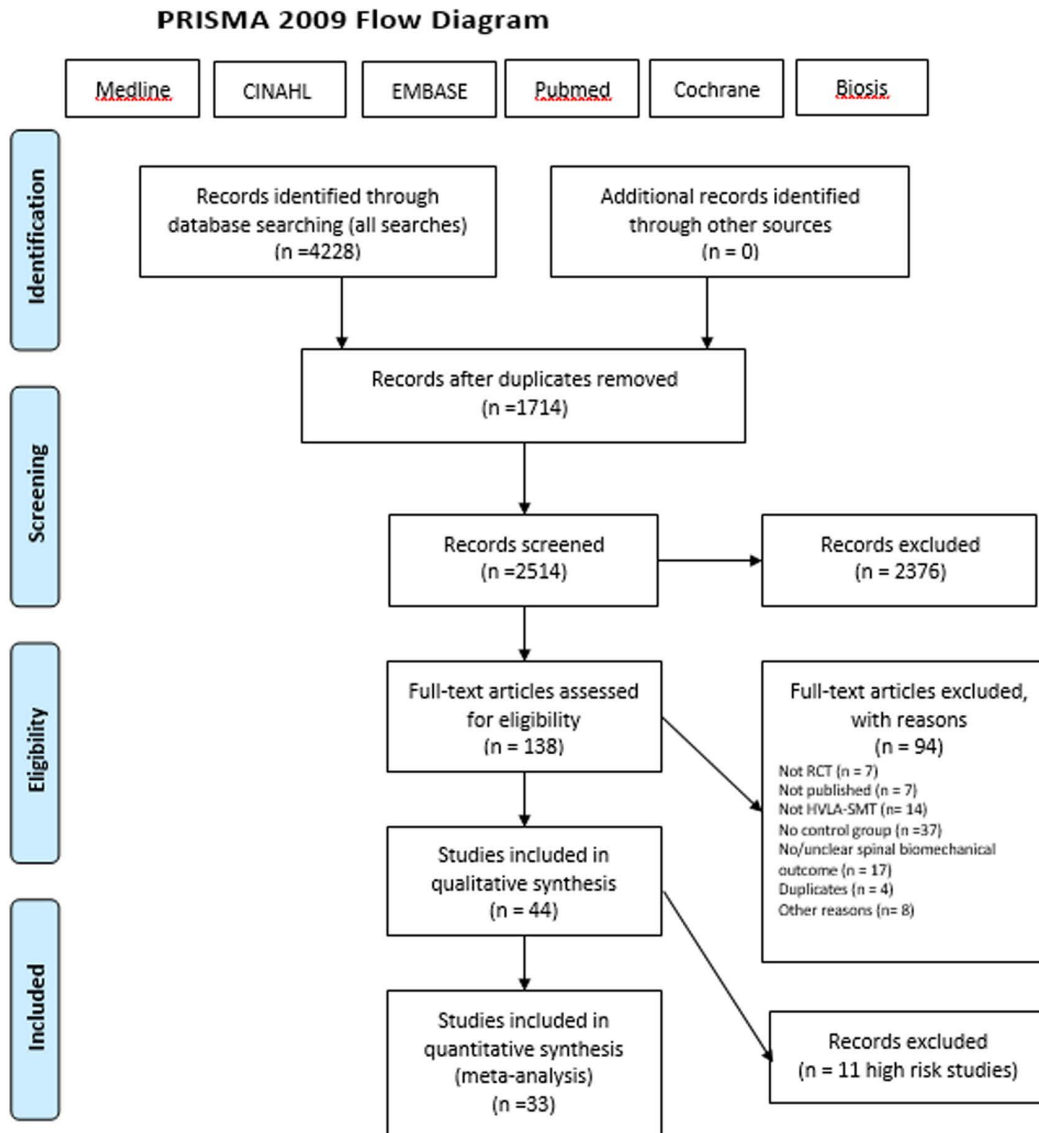

From: Moher D, Liberati A, Tetzlaff J, Altman DG, The PRISMA Group (2009). Preferred Reporting Items for Systematic Reviews and Meta-Analyses: The PRISMA Statement. *PLoS Med* 6(7): e1000097. doi:10.1371/journal.pmed1000097

For more information, visit [www.prisma-statement.org](http://www.prisma-statement.org).

**Fig 1. Prisma flow diagram for the whole study including searches 2018, 2020, 2023 and 2024.**

<https://doi.org/10.1371/journal.pone.0328048.g001>

**Effects of thoracic HVLA thrusts on thoracic ROM.** Two studies (5.8%) with low risk of bias investigated the effect immediately after the thoracic spine manipulation on thoracic ROM. One [2.9%] study showed an immediate post-treatment improvement on active thoracic flexion but not on extension, of a single T9 HVLA thrust compared to a sham

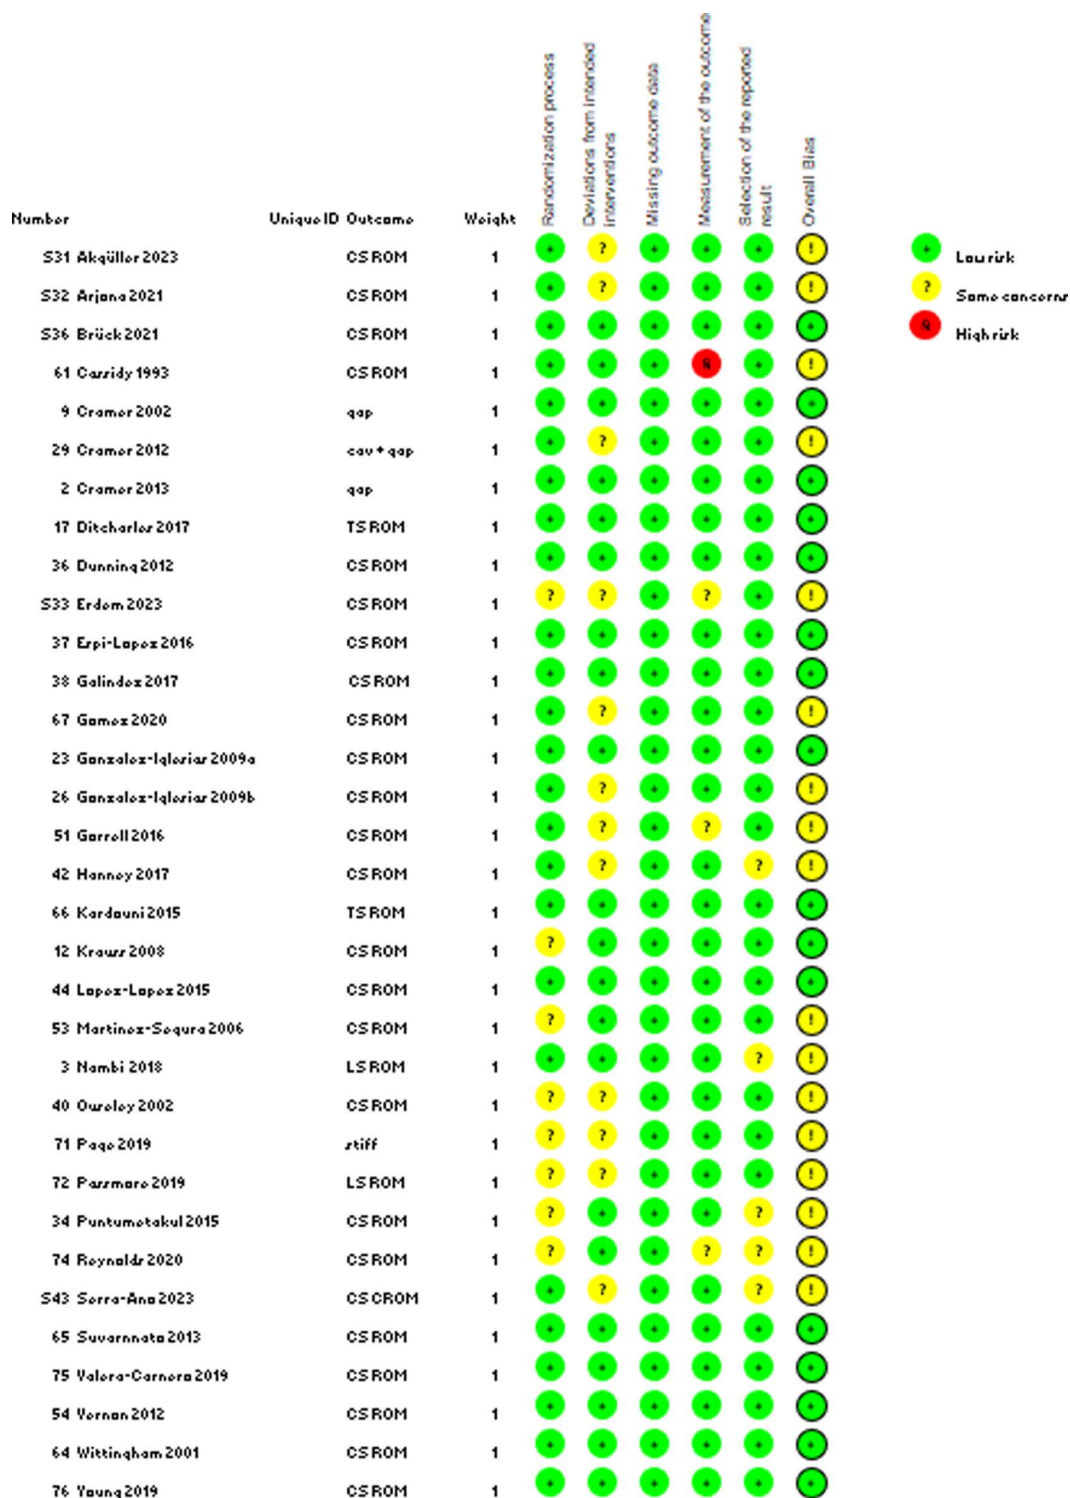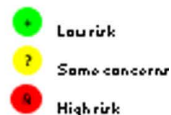

Fig 2. Results of the quality assessment using the RoB 2 tool including studies with low risk and some concerns [high-risk studies excluded].

<https://doi.org/10.1371/journal.pone.0328048.g002>

Table 1. Local effects of HVLA thrust on range of motion cervical spine.

| Autor, Year             | Participants [A]Symptomatic Age Number                                                                                                                                                                                                            | Treatment region/Region of interest | Intervention                                                                                                                                                               | Control                                                                                                                                                                                                                                                | Time to assessment [relative to intervention]         | Biomechanical outcome parameters                                                                                                             | Main biomechanical results                                                                                                                                                                                                                                                                                                                                                                                                                                                                                                                                                                                                                                                                                                                                                                                                                                                                                                                              | RoB Rating           |
|-------------------------|---------------------------------------------------------------------------------------------------------------------------------------------------------------------------------------------------------------------------------------------------|-------------------------------------|----------------------------------------------------------------------------------------------------------------------------------------------------------------------------|--------------------------------------------------------------------------------------------------------------------------------------------------------------------------------------------------------------------------------------------------------|-------------------------------------------------------|----------------------------------------------------------------------------------------------------------------------------------------------|---------------------------------------------------------------------------------------------------------------------------------------------------------------------------------------------------------------------------------------------------------------------------------------------------------------------------------------------------------------------------------------------------------------------------------------------------------------------------------------------------------------------------------------------------------------------------------------------------------------------------------------------------------------------------------------------------------------------------------------------------------------------------------------------------------------------------------------------------------------------------------------------------------------------------------------------------------|----------------------|
| <b>Cervical spine</b>   |                                                                                                                                                                                                                                                   |                                     |                                                                                                                                                                            |                                                                                                                                                                                                                                                        |                                                       |                                                                                                                                              |                                                                                                                                                                                                                                                                                                                                                                                                                                                                                                                                                                                                                                                                                                                                                                                                                                                                                                                                                         |                      |
| Serra-Ano et al. [2023] | 50 participants with acute and chronic non-specific neck pain [minimum duration of the symptoms being 1 month]<br>Group 1 [n = 25: mean age 33.40 ± 12.06]<br>Group 2 [n = 23: mean age 32.00 ± 12.06]                                            | Cervical spine [C1-C7]              | Group 1: [Single session] High-velocity and low-amplitude cervical manipulation with two manipulation attempts per vertebral level identified. Max. of three manipulations | Group 2: [Single session] Sham hands-on technique and pressure-less touches with the physiotherapist's hands on several head and shoulder areas for 10 minutes. Light superficial touches were applied on standardized anatomic areas for two minutes. | Before and 5 minutes after treatment                  | Active cervical range of motion in each movement direction [flexion, extension, right and left lateral bending, right and left rotation]     | A single session of cervical manipulation had no significant impact on any study biomechanical variables, except for right -side bending [1.97°] and left rotation [1.95°].<br>No improvement in any ROM in group 2.<br>Effect size right-side bending group 1: 0.35<br>Effect size left rotation group 1: 0.30<br>Minimal detectable change not overcome.                                                                                                                                                                                                                                                                                                                                                                                                                                                                                                                                                                                              | <b>Some concerns</b> |
| Akgüller et al. [2023]  | 60 volunteers [both sexes] with mechanical neck pain lasting 3 months<br>20-50 years [Mean age: 31.45 ± 7.31]<br>Group 1 [n = 20: mean age: 31.00 ± 7.10]<br>Group 2 [n = 20: mean age: 31.65 ± 8.38]<br>Group 3 [n = 20: mean age: 31.70 ± 6.71] | Cervical spine [C2-C7]              | Group 1: Cervical thrust manipulation<br>Group 3: Cervical thrust and exercise<br>Twice a week for six weeks                                                               | Group 2: Exercise program consisting of progressive stabilization and exercise was performed by group two under supervision.<br>Twice a week for six weeks                                                                                             | Immediately post-treatment [Six weeks after baseline] | Active neck flexion-extension right-left lateral flexion and right-left rotation ROMs were assessed with the CROM Deluxe cervical goniometer | Neck flexion increased significantly in groups 1 [5.45°] and 3 [7.30°] and neck extension increased significantly in all groups [group 1: 6.10°/ group 2: 3.55°/ group 3: 6.65°]. Right lateral flexion increased significantly in all groups [group 1: 7.95°/ group 2: 5.00°/ group 3: 7.50°]. Lateral flexion left [group 1: 7.00°/ group 2: 1.95°/ group 3: 6.60°] increased statistically in all groups as well rotation to both sides increased statistically significantly right [group 1: 7.25°/ group 2: 3.15°/ group 3: 9.05°], left [group 1: 6.85°/ group 2: 2.50°/ group 3: 7.55°].<br>In groups 1 and 3, all movements increased above the minimal detectable difference [MDC] > 5°. In group 2 only lateral flexion right reached [MDC] > 5°<br>Effect sizes between group 2 and group 3:<br>Flexion: 0.54<br>Extension: 0.26<br>Lateral Flexion right: 0.38<br>Lateral flexion left: 0.64<br>Rotation right: 0.66<br>Rotation left: 0.67 | <b>Some concerns</b> |

(Continued)

Table 1. (Continued)

| Author, Year         | Participants [A]Symptomatic Age Number                                                                                                                                                                                                          | Treatment region/Region of interest | Intervention                                                                                                                                     | Control                     | Time to assessment [relative to intervention]                                       | Biomechanical outcome parameters                   | Main biomechanical results                                                                                                                                                                                                                                                                                                                                                                                                                                                                                                                                                                                                                                                                                                                                                                                                                                                                                                                                                                                                                                                                                | RoB Rating    |
|----------------------|-------------------------------------------------------------------------------------------------------------------------------------------------------------------------------------------------------------------------------------------------|-------------------------------------|--------------------------------------------------------------------------------------------------------------------------------------------------|-----------------------------|-------------------------------------------------------------------------------------|----------------------------------------------------|-----------------------------------------------------------------------------------------------------------------------------------------------------------------------------------------------------------------------------------------------------------------------------------------------------------------------------------------------------------------------------------------------------------------------------------------------------------------------------------------------------------------------------------------------------------------------------------------------------------------------------------------------------------------------------------------------------------------------------------------------------------------------------------------------------------------------------------------------------------------------------------------------------------------------------------------------------------------------------------------------------------------------------------------------------------------------------------------------------------|---------------|
| Arjona et al. [2021] | 96 participants [both sexes] Chronic [at least 3 months] mechanical neck pain 18–40 years [Mean age 29.5 ± 5.2 years] Group 1 [n = 31]: mean age: 28.71 ± 5.53 Group 2 [n = 31]: mean age 29.33 ± 4.80 Group 3 [n = 34]: mean age: 30.29 ± 5.14 | Upper Cervical spine                | Group 2: INYBI group [Instrumental suboccipital inhibition] Group 3: INYBI and upper cervical manipulation technique Two sessions one week apart | Group 1: Manual inhibition] | Immediately post-treatment and immediately post-treatment [One-week post-treatment] | Cervical range of motion [CROM device] every plane | No statistically significant between group differences. Within group 2 there were three time points at which the recent measurements were statistically significantly different compared to the baseline treatment. Right rotation left rotation after the first intervention [62.63° to 65.33°/ 62.60° to 65.43°], and right side bending after the second intervention [38.03° to 42.03°]. Within group 3 there were measurements statistically significant for Flexion baseline [55.73°] to after second intervention [60.12°]. Extension pre-intervention of second week [63.65°] to after the second intervention [66.15°], rotation right baseline [62.71°] to after second intervention [67.73°], rotation left baseline [64.85°] to after first intervention [67.53°] and after the second intervention [71.47°], right side bending between pre-intervention of second week [37.94°] and after the second intervention [40.59°], left side bending to baseline [44.23°] and pre-intervention second week [44.85°] and after the second intervention [48.24°]. Effect sizes between group 2 and 3 | Some concerns |

(Continued)

Table 1. (Continued)

| Autor, Year            | Participants<br>[A]Symptomatic<br>Age<br>Number                                                                                                                               | Treatment<br>region/<br>Region of<br>interest | Intervention                                                                                                                                                                | Control                                                 | Time to<br>assessment<br>[relative to<br>intervention] | Biomechanical<br>outcome<br>parameters                        | Main biomechanical results                                                                                                                                                                                                                                                                                                                                                                                                                                                                                                                                                                                                                            | RoB Rating |
|------------------------|-------------------------------------------------------------------------------------------------------------------------------------------------------------------------------|-----------------------------------------------|-----------------------------------------------------------------------------------------------------------------------------------------------------------------------------|---------------------------------------------------------|--------------------------------------------------------|---------------------------------------------------------------|-------------------------------------------------------------------------------------------------------------------------------------------------------------------------------------------------------------------------------------------------------------------------------------------------------------------------------------------------------------------------------------------------------------------------------------------------------------------------------------------------------------------------------------------------------------------------------------------------------------------------------------------------------|------------|
| Brück et al.<br>[2021] | 60 participants<br>[both sexes].<br>Chronic neck pain<br>[> 3 months]><br>NRS 2<br>30-65 years<br>MT [n = 20: mean<br>age 50.1 ± 11.8]<br>CG [n = 20: mean<br>age 45.7 ± 9.4] | Cervical<br>and upper<br>thoracic             | Two sessions of<br>high-velocity<br>low-amplitude<br>[HVLA] manipulation for<br>each restricted<br>segment [cervical: rotation<br>technique,<br>thoracic: drop<br>technique | 2] No treatment<br>3] Fascial treatment<br>[2 sessions] | After the last<br>treatment<br>session                 | Cervical range<br>of motion of all<br>planes [CROM<br>device] | Flexion: Pre to Post1: 0.08, Post1 to Post2: 0.11 Post2 to Post3: 0.09, Pre to Post3: 0.2<br>Extension: Pre to Post1: 0.08, Post1 to Post2: 0.11 Post2 to Post3: 0.09, Pre to Post3: 0.7<br>Right rotation: Pre to Post1: 0.05, Post1 to Post2: 0.17, Post2 to Post3: 0.25, Pre to Post3: 0.23<br>Left rotation:<br>Pre to Post1: 0.01, Post1 to Post2: 0.13 Post2 to Post3: 0.24, Pre to Post3: 0.35<br>Right side bending:<br>Pre to Post1: 0.03, Post1 to Post2: 0.45 Post2 to Post3: 0.23, Pre to Post3: -0.16<br>Left side bending<br>Pre to Post1: 0.21, Post1 to Post2: 0.38 Post2 to Post3: 0.30, Pre to Post3: 0.11<br>MDC was not assessed. | Low        |

(Continued)

Table 1. (Continued)

| Author, Year          | Participants [A]Symptomatic Age Number                                                                                                                      | Treatment region/Region of interest | Intervention                                | Control                                                            | Time to assessment [relative to intervention] | Biomechanical outcome parameters                                                                                                                         | Main biomechanical results                                                                                                                                                                                                                                                                                                                                                                                                                                                                                                                                                                                                                                                                                                                                                                                                                                                                                                                                     | RoB Rating   |
|-----------------------|-------------------------------------------------------------------------------------------------------------------------------------------------------------|-------------------------------------|---------------------------------------------|--------------------------------------------------------------------|-----------------------------------------------|----------------------------------------------------------------------------------------------------------------------------------------------------------|----------------------------------------------------------------------------------------------------------------------------------------------------------------------------------------------------------------------------------------------------------------------------------------------------------------------------------------------------------------------------------------------------------------------------------------------------------------------------------------------------------------------------------------------------------------------------------------------------------------------------------------------------------------------------------------------------------------------------------------------------------------------------------------------------------------------------------------------------------------------------------------------------------------------------------------------------------------|--------------|
| Cassidy et al. [1992] | Patients with unilateral neck pain with referral to the trapezius HVLA group [n = 52; mean age 34.5 ± 13.0 Mobilization group [n = 48; mean age 37.7 ± 12.5 | Cervical                            | HVLA to cervical spine [1 thrust] 1 session | Mobilization to cervical spine [muscle energy technique] 1 session | Immediately post-treatment [within 5 minutes] | Active cervical ROM [flexion, extension, ipsilateral and contralateral lateral flexion, ipsilateral and contralateral rotation] Goniometer [CROM Device] | Flexion increased by 5.1° in the manipulation group and by 3.9° in the mobilization group. Extension increased by 3.1° in the manipulation group and by 1.3° in the mobilization group. Ipsilateral rotation increased by 5.0° in the manipulation group and by 4.2° in the mobilization group. Contralateral rotation increased by 3.6° in the manipulation group and by 2.4° in the mobilization group. Ipsilateral flexion increased by 3.4° in the manipulation group and by 2.0° in the mobilization group. Contralateral flexion increased by 4.3° in the manipulation group and by 3.0° in the mobilization group. There was no statistically significant difference between the change score of the manipulation and the mobilization group [p-values between 0.25 and 0.67]. Effect sizes between groups: Flexion: 0.18 Extension: 0.17 Ipsilateral Rotation: 0.06 Contralateral Rotation: 0.11 Ipsilateral Flexion: 0.14 Contralateral Flexion: 0.15 | Some concern |

(Continued)

Table 1. (Continued)

| Autor, Year              | Participants [A]Symptomatic Age Number                                                                                         | Treatment region/Region of interest | Intervention                                                                                                                                                                             | Control                                                                                                          | Time to assessment [relative to intervention] | Biomechanical outcome parameters                                                 | Main biomechanical results                                                                                                                                                                                                                                                                                                                                                                                                                                                                                                                                                                                                                                                                                                                                                                                                                                                                                                                                                                                                                                                                                                                                                                                                                                                                                                                                                                                                                                                                                                                         | RoB Rating |
|--------------------------|--------------------------------------------------------------------------------------------------------------------------------|-------------------------------------|------------------------------------------------------------------------------------------------------------------------------------------------------------------------------------------|------------------------------------------------------------------------------------------------------------------|-----------------------------------------------|----------------------------------------------------------------------------------|----------------------------------------------------------------------------------------------------------------------------------------------------------------------------------------------------------------------------------------------------------------------------------------------------------------------------------------------------------------------------------------------------------------------------------------------------------------------------------------------------------------------------------------------------------------------------------------------------------------------------------------------------------------------------------------------------------------------------------------------------------------------------------------------------------------------------------------------------------------------------------------------------------------------------------------------------------------------------------------------------------------------------------------------------------------------------------------------------------------------------------------------------------------------------------------------------------------------------------------------------------------------------------------------------------------------------------------------------------------------------------------------------------------------------------------------------------------------------------------------------------------------------------------------------|------------|
| Espl-López et al. [2016] | Subjects with tension-type headache [TTH] HVLA group [n = 51: mean age 37.7 ± 10.6 Control group [n = 51: mean age 40.5 ± 11.3 | Cervical                            | HVLA to cervical spine [C0/C1, each side] AND Massage to the cervical spine [10 minutes, focus cervical/occipital muscles] AND 10 min rest [As in control group] 4 sessions over 4 weeks | Massage to cervical spine [10 minutes, focus cervical/occipital muscles] AND 10 min rest 4 sessions over 4 weeks | Post-treatment [8 weeks post-treatment]       | Active cervical ROM [upper cervical and cervical flexion, extension] CROM device | Upper cervical spine flexion changed from 8.31° [pre-test] to 11.16° [post-test] to 11.06° [follow-up] in the massage group. Upper cervical spine extension changed from 15.00° [pre-test] to 18.80° [post-test] to 18.96° [follow-up] in the massage group. Upper cervical spine flexion changed from 7.82° [pre-test] to 13.16° [post-test] to 11.67° [follow-up] in the massage + manipulation group. Upper cervical spine extension changed from 16.22° [pre-test] to 23.25° [post-test] to 22.20° [follow-up] in the massage + manipulation group. Cervical spine flexion changed from 48.18° [pre-test] to 55.22° [post-test] to 53.88° [follow-up] in the massage group. Cervical spine extension changed from 45.53° [pre-test] to 51.37° [post-test] to 51.31° [follow-up] in the massage group. Cervical spine flexion changed from 52.57° [pre-test] to 54.31° [post-test] to 52.59° [follow-up] in the massage + manipulation group. Cervical spine extension changed from 46.12° [pre-test] to 52.27° [post-test] to 50.73° [follow-up] in the massage + manipulation group. Interaction group * time point significant for MANOVA; post-hoc tests sig. [p's < 0.05] for two of the four directions tested [sig for flexion and upper cervical flexion, with small to medium effect sizes. Not significant for extension and upper cervical extension]. Effect sizes between groups: Upper cervical flexion: -0.59 Upper cervical extension: -0.37 Cervical flexion: 0.48 Cervical extension: -0.02 No MDC was reported in the study. | Low risk   |

(Continued)

Table 1. (Continued)

| Author, Year                    | Participants [A]Symptomatic Age Number                                                                                                                                                | Treatment region/Region of interest    | Intervention                                                                                                                                                                    | Control                                                                                                            | Time to assessment [relative to intervention] | Biomechanical outcome parameters                                                                                | Main biomechanical results                                                                                                                                                                                                                                                                                                                                                                                                                                                                                                                                                                                                                                                                                                                                                                                                                | RoB Rating |
|---------------------------------|---------------------------------------------------------------------------------------------------------------------------------------------------------------------------------------|----------------------------------------|---------------------------------------------------------------------------------------------------------------------------------------------------------------------------------|--------------------------------------------------------------------------------------------------------------------|-----------------------------------------------|-----------------------------------------------------------------------------------------------------------------|-------------------------------------------------------------------------------------------------------------------------------------------------------------------------------------------------------------------------------------------------------------------------------------------------------------------------------------------------------------------------------------------------------------------------------------------------------------------------------------------------------------------------------------------------------------------------------------------------------------------------------------------------------------------------------------------------------------------------------------------------------------------------------------------------------------------------------------------|------------|
| Galindez-Ibarbera et al. [2017] | Asymptomatic volunteers<br>Indiscriminate HVLA group [AMC5] [n = 12: mean age 30.5±3.1]<br>HVLA group [MT] [n = 12: mean age 30.8±4.0]<br>Sham group [ST] [n = 12: mean age 31.2±2.2] | Cervical<br>OR<br>Cervical or thoracic | Group 1<br>Indiscriminate HVLA group: HVLA to C5 right OR<br>Group 2<br>HVLA group [MT]: HVLA to cervical or upper thoracic spine [based on diagnosed dysfunction]<br>1 session | Group 3] Sham group [ST]: Same positioning indiscriminate HVLA group, no thrust, 3 rotation movements<br>1 session | Immediately post-treatment                    | Active cervical ROM [flexion, extension, right/left lateral flexion, right/left rotation]<br>CROM<br>goniometer | Within group change:<br>Flexion<br>AMC5: 4.30°<br>MT: 5.16°<br>ST: 1.59°<br>Extension<br>AMC5: 6.98°<br>MT: 10.44°<br>ST: -3.37°<br>Right side bending<br>AMC5: 3.62<br>MT: 7.65<br>ST: 5.98<br>Left side bending:<br>AMC5: 6.90°<br>MT: 10.05°<br>ST: 5.85°<br>Right rotation:<br>AMC5: 8.70°<br>MT: 7.66°<br>ST: 7.09°<br>Left rotation:<br>AMC5: 4.03<br>MT: 12.25°<br>ST: 5.81°<br>AMC 5 vs ST or MT vs ST meaningful comparisons<br>Significant group interaction [p < 0.01].<br>The between group difference in change for left rotation between AMC5 and ST, MT and ST.<br>No MDC was reported<br>Effect sizes between groups:<br>Flexion:<br>Group 1 vs Group 2: -0.05<br>Group 1 vs Group 3: 0.22<br>Group 2 vs Group 3: 0.27<br>Extension:<br>Group 1 vs Group 2: -0.85<br>Group 1 vs Group 3: 0.64<br>Group 2 vs Group 3: 1.49 | Low risk   |

(Continued)

Table 1. (Continued)

| Autor, Year         | Participants [A]Symptomatic Age Number                                                                                                                                                                                                                                                                      | Treatment region/Region of interest | Intervention                                                                                                                     | Control                                                                                                       | Time to assessment [relative to intervention]                      | Biomechanical outcome parameters                                 | Main biomechanical results                                                                                                                                                                                                                                                                                                                                                                                                                                                                                                                                                                                                                                                                                                                                                                                                                                                                               | RoB Rating    |
|---------------------|-------------------------------------------------------------------------------------------------------------------------------------------------------------------------------------------------------------------------------------------------------------------------------------------------------------|-------------------------------------|----------------------------------------------------------------------------------------------------------------------------------|---------------------------------------------------------------------------------------------------------------|--------------------------------------------------------------------|------------------------------------------------------------------|----------------------------------------------------------------------------------------------------------------------------------------------------------------------------------------------------------------------------------------------------------------------------------------------------------------------------------------------------------------------------------------------------------------------------------------------------------------------------------------------------------------------------------------------------------------------------------------------------------------------------------------------------------------------------------------------------------------------------------------------------------------------------------------------------------------------------------------------------------------------------------------------------------|---------------|
| Gomez et al. [2020] | 44 patients [both sexes]<br>Chronic [chronic >3 months] non-specific neck pain higher than 2 on the 11 numeric pain rating scale and positive cervical flexion rotation test on one side.<br>18-60 years<br>Experimental group [n=22: mean age 38.36±11.66]<br>Control group [n = 22: mean age 37.50±11.83] | Upper cervical spine                | The experimental group received a single upper cervical spine rotational thrust<br>To the side of the positive CFRT<br>1 Session | Sham technique [Physiotherapist places his hands on the patients' neck and turns off ultrasound]<br>1 Session | Immediately post-treatment [seven and fifteen days post-treatment] | Cervical flexion rotation test with CROM instrument [goniometer] | Right side bending:<br>Group 1 vs Group 2: -0.27<br>Group 1 vs Group 3: -0.08<br>Group 2 vs Group 3: 0.19<br>Left side bending:<br>Group 1 vs Group 2: 0.05<br>Group 1 vs Group 3: -0.27<br>Group 2 vs Group 3: -0.32<br>Right rotation:<br>Group 1 vs Group 2: 0.06<br>Group 1 vs Group 3: 0.00<br>Group 2 vs Group 3: -0.06<br>Left rotation:<br>Group 1 vs Group 2: -0.52<br>Group 1 vs Group 3: -0.08<br>Group 2 vs Group 3: 0.44<br>Rotation differed between groups at baseline [1.22°], post-immediate [8.31°], after seven days [7.90°], and after 15 days [6.81°]. The experimental group showed an increase of limitation rotation post-immediate of 7.4°, seven days 6, 8° and 15 days 6.13°. MDC reported 7° degrees are considered meaningful [Hall et al. 2004]<br>Effect size between experimental group over time compared with control group as calculated by Gomez et al. [2020]: 0.75 | Some concerns |

(Continued)

Table 1. (Continued)

| Author, Year          | Participants [A]Symptomatic Age Number                                                                                                                                                                                         | Treatment region/Region of interest | Intervention                                                                                                                                                                                                         | Control                                             | Time to assessment [relative to intervention] | Biomechanical outcome parameters                                                                                       | Main biomechanical results                                                                                                                                                                                                                                                                                                                                                                                                                                                                                                                               | RoB Rating    |
|-----------------------|--------------------------------------------------------------------------------------------------------------------------------------------------------------------------------------------------------------------------------|-------------------------------------|----------------------------------------------------------------------------------------------------------------------------------------------------------------------------------------------------------------------|-----------------------------------------------------|-----------------------------------------------|------------------------------------------------------------------------------------------------------------------------|----------------------------------------------------------------------------------------------------------------------------------------------------------------------------------------------------------------------------------------------------------------------------------------------------------------------------------------------------------------------------------------------------------------------------------------------------------------------------------------------------------------------------------------------------------|---------------|
| Gorrell et al. [2016] | Volunteers with mechanical neck pain > 1 month<br>HVL group<br>[n = 21;<br>mean age<br>24.4 ± 4.0]<br>Instrument group<br>[IAM] [n = 22;<br>mean age<br>25.0 ± 4.9]<br>Stretching group<br>[n = 22;<br>mean age<br>23.8 ± 3.5] | Cervical                            | HVLA to the cervical spine [1 thrust]<br>AND<br>active cervical muscle stretching routine 1 session<br>OR<br>IAM to the cervical spine [1 application]<br>AND<br>active cervical muscle stretching routine 1 session | Active cervical muscle stretching routine 1 session | Immediately post-treatment                    | Active cervical ROM [flexion, extension, left/right lateral flexion, left/right rotation]<br>Digital dual inclinometer | Immediate change in rotation bilaterally [ipsilateral [10.35°]; F = 11.17, p = .002; contralateral [6.32°]; = 6.44, p = .015] for the HVL group. There was a between group difference for lateral flexion on the contralateral side to manipulation [F = 12.44, p = .001] in HVL [6.40°] vs. IAM. No significant differences were found in other directions. Statistics for comparison to the control group [only stretching] were not reported. No MDC was reported<br>Effect sizes could not be calculated as baseline data for ROM was not published. | Some concerns |

(Continued)

Table 1. (Continued)

| Autor, Year               | Participants [A]Symptomatic Age Number                                                                                                                                                 | Treatment region/Region of interest | Intervention                                                          | Control                                                                                                                                                           | Time to assessment [relative to intervention] | Biomechanical outcome parameters                                                  | Main biomechanical results                                                                                                                                                                                                                                                                                                                                                                                                                                                                                                                                                                                                                                                                                                                                                                                                                                                                                                                                                                                                                                                                                | RoB Rating |
|---------------------------|----------------------------------------------------------------------------------------------------------------------------------------------------------------------------------------|-------------------------------------|-----------------------------------------------------------------------|-------------------------------------------------------------------------------------------------------------------------------------------------------------------|-----------------------------------------------|-----------------------------------------------------------------------------------|-----------------------------------------------------------------------------------------------------------------------------------------------------------------------------------------------------------------------------------------------------------------------------------------------------------------------------------------------------------------------------------------------------------------------------------------------------------------------------------------------------------------------------------------------------------------------------------------------------------------------------------------------------------------------------------------------------------------------------------------------------------------------------------------------------------------------------------------------------------------------------------------------------------------------------------------------------------------------------------------------------------------------------------------------------------------------------------------------------------|------------|
| Lopez-Lopez et al. [2015] | Patients with chronic neck pain > 3 months<br>HVLA group [n = 15; mean age 35.4 ± 8.0]<br>Mobilization group [n = 16; mean age 36.0 ± 9.9]<br>SNAG group [n = 17; mean age 37.8 ± 8.6] | Cervical                            | HVLA to the cervical spine [one side, maximum 2 thrusts]<br>1 session | Mobilization to the cervical spine [one side, grade III PA, 3x 2 minutes]<br>1 session<br>OR<br>Sustain apophyseal natural glide [SNAG, 10x3 series]<br>1 session | 5 min post-treatment                          | Active cervical ROM [flexion/extension, lateral flexion, rotation]<br>CROM device | Rotation changed preintervention – post-intervention in the HVLA group [11.63°], mobilization group [5.14], and SNAG group [4.45°]. Lateral flexion changed preintervention – postintervention in the HVLA group [7.95°], mobilization group [4.78°], and SNAG group [7.35°]. Flexion-extension changed pre-intervention – post-intervention in the HVLA group [37.14°], mobilization group [17.68°], and SNAG group [18.69°].<br>Trend for the three-way treatment x anxiety x time interaction with respect to CROM in lateral flexion: Mobilization better under high anxiety condition, SMT under low anxiety condition.<br>MDC was reported.<br>Effect sizes between groups:<br>CROM rotation:<br>HVLA group vs mobilization group: -0.77<br>HVLA group vs SNAG group: 0.53<br>Mobilization group vs SNAG group: 1.30<br>CROM lateral-flexion:<br>HVLA group vs mobilization group: -3.36<br>HVLA group vs SNAG group: -0.25<br>AP mob vs SNAG: 3.11<br>CROM flexion-extension:<br>HVLA group vs mobilization group: 1.54<br>HVLA group vs SNAG group: 1.54<br>Mobilization group vs SNAG group: 0.0 | Low risk   |

(Continued)

Table 1. (Continued)

| Autor, Year                   | Participants<br>[A]Symptomatic<br>Age<br>Number                                                                                                             | Treatment<br>region/<br>Region of<br>interest | Intervention                                                  | Control                                                                               | Time to<br>assessment<br>[relative to<br>intervention] | Biomechanical<br>outcome<br>parameters                                                                   | Main biomechanical results                                                                                                                                                                                                                                                                                                                                                                                                                                                                                                                                                                                                                                                                                                                                                                                                                                                                                                                                                                                                                                                                                                                                                                                                  | RoB Rating    |
|-------------------------------|-------------------------------------------------------------------------------------------------------------------------------------------------------------|-----------------------------------------------|---------------------------------------------------------------|---------------------------------------------------------------------------------------|--------------------------------------------------------|----------------------------------------------------------------------------------------------------------|-----------------------------------------------------------------------------------------------------------------------------------------------------------------------------------------------------------------------------------------------------------------------------------------------------------------------------------------------------------------------------------------------------------------------------------------------------------------------------------------------------------------------------------------------------------------------------------------------------------------------------------------------------------------------------------------------------------------------------------------------------------------------------------------------------------------------------------------------------------------------------------------------------------------------------------------------------------------------------------------------------------------------------------------------------------------------------------------------------------------------------------------------------------------------------------------------------------------------------|---------------|
| Martinez-Segura et al. [2006] | Patients with mechanical neck pain $\geq$ 1 month<br>HVL A group<br>[n = 34:<br>mean age 35 $\pm$ 10]<br>Control group<br>[n = 37:<br>mean age 39 $\pm$ 10] | Cervical                                      | HVLA to cervical spine [C:3/4 or C4/5, 1 thrust]<br>1 session | Mobilization to the cervical spine [no thrust, position held 30 seconds]<br>1 session | 5 minutes post-treatment                               | Active cervical ROM [flexion, extension, right/left lateral flexion, right/left rotation]<br>CROM Device | Cervical flexion improved by 7° in the HVLA group and 1.5° in the mobilization group. Cervical extension improved by 8° in the experimental group and 1.4° in the mobilization group. Left lateral flexion improved by 5° in the HVLA group and 0.8° in the mobilization group. Right lateral flexion improved by 5° in the experimental group and 0.8° in the control group. Left rotation improved by 9° in the experimental group and 0.3° in the mobilization group. Right rotation improved by 10° in the experimental group and 0.4° in the mobilization group.<br>The intergroup comparison [unpaired t-test analysis] between the improvement [pre-post scores] in both groups showed that the experimental group obtained a greater improvement than the mobilization group in all the outcome measures [P < .001]. Pearson correlation test showed a negative association between the improvement in neck pain at rest and the improvement in each cervical range of motion [all P < .001]. No MDC was reported<br>Effect sizes between groups:<br>Cervical flexion: 0.89<br>Cervical extension: 0.76<br>Left lateral flexion: 0.68<br>Right lateral flexion: 0.71<br>Left rotation: 0.95<br>Right rotation: 1.11 | Some concerns |

(Continued)

Table 1. (Continued)

| Author, Year                              | Participants<br>[A]Symptomatic<br>Age<br>Number                                                                                                                                             | Treatment<br>region/<br>Region of<br>interest | Intervention                                                          | Control                                                                  | Time to<br>assessment<br>[relative to<br>intervention]                                                        | Biomechanical<br>outcome<br>parameters                                                                                       | Main biomechanical results                                                                                                                                                                                                                                                                                                                                                                                                                                                                                                                                                                                                                                                                                                                                                                                                                                                               | RoB Rating       |
|-------------------------------------------|---------------------------------------------------------------------------------------------------------------------------------------------------------------------------------------------|-----------------------------------------------|-----------------------------------------------------------------------|--------------------------------------------------------------------------|---------------------------------------------------------------------------------------------------------------|------------------------------------------------------------------------------------------------------------------------------|------------------------------------------------------------------------------------------------------------------------------------------------------------------------------------------------------------------------------------------------------------------------------------------------------------------------------------------------------------------------------------------------------------------------------------------------------------------------------------------------------------------------------------------------------------------------------------------------------------------------------------------------------------------------------------------------------------------------------------------------------------------------------------------------------------------------------------------------------------------------------------------|------------------|
| Ouseley<br>and Parkin-<br>Smith<br>[2002] | Patients with<br>chronic tension-<br>type headache<br>frequency of at<br>least 15 days per<br>month<br>HVLA group [n = 5:<br>average age 32]<br>Control group<br>[n = 6: average<br>age 48] | Cervical                                      | HVLA to the<br>cervical spine<br>Max. 8 ses-<br>sions over 4<br>weeks | Mobilization to the<br>cervical spine<br>Max. 8 sessions over<br>4 weeks | end of each<br>treatment<br>week<br>comparison<br>between<br>baseline<br>and final<br>treatment<br>recordings | Cervical ROM<br>[flexion, exten-<br>sion, left/right<br>lateral flexion,<br>left/right rotation]<br>Cervical<br>inclinometer | Within the HVLA group, the follow-<br>ing changes [pre-post treatment]<br>were reported:<br>Flexion: -6°<br>Extension: - 0.4°<br>Right rotation: 1.5°<br>Left rotation: 10.4°<br>Right lateral flexion: - 1.4°<br>Left lateral flexion: 0.3°<br>For the mobilization group, the<br>following changes [pre-post treat-<br>ment] were reported:<br>Flexion: - 1.3°<br>Extension: 5.1°<br>Right rotation: 6.5°<br>Left rotation: 5.4°<br>Right lateral flexion: 1.3°<br>Left lateral flexion: -3.6°<br>No significant intra- or inter-<br>group changes in ROM between<br>baseline and final treatment. No<br>statistical comparison of pre-post<br>differences between groups. No<br>MDC was reported.<br>Effect sizes between groups:<br>Flexion: -0.13<br>Extension: -0.49<br>Rotation right: -0.36<br>Rotation left: 0.29<br>Lateral flexion right: -0.42<br>Lateral flexion left: 0.84 | Some<br>concerns |

(Continued)

Table 1. (Continued)

| Autor, Year            | Participants [A]Symptomatic Age Number                                                                                             | Treatment region/Region of interest | Intervention                                                                                                                                                  | Control                                                                                                                                                                     | Time to assessment [relative to intervention]                         | Biomechanical outcome parameters                                          | Main biomechanical results                                                                                                                                                                                                                                                                                                                                                                                                                                                                                                                                                                                                                                                                                                                                                                                                                                                                                                                                                                                                                                                                                                                                                                                                                                                                                                                                                           | RoB Rating    |
|------------------------|------------------------------------------------------------------------------------------------------------------------------------|-------------------------------------|---------------------------------------------------------------------------------------------------------------------------------------------------------------|-----------------------------------------------------------------------------------------------------------------------------------------------------------------------------|-----------------------------------------------------------------------|---------------------------------------------------------------------------|--------------------------------------------------------------------------------------------------------------------------------------------------------------------------------------------------------------------------------------------------------------------------------------------------------------------------------------------------------------------------------------------------------------------------------------------------------------------------------------------------------------------------------------------------------------------------------------------------------------------------------------------------------------------------------------------------------------------------------------------------------------------------------------------------------------------------------------------------------------------------------------------------------------------------------------------------------------------------------------------------------------------------------------------------------------------------------------------------------------------------------------------------------------------------------------------------------------------------------------------------------------------------------------------------------------------------------------------------------------------------------------|---------------|
| Reynolds et al. [2020] | Patients with temporomandibular disorder<br>HVLA group [n = 25; mean age 32.2 ± 11.3]<br>Sham group [n = 25; mean age 38.8 ± 14.8] | Cervical                            | HVLA to C0/C1 and C1/2 [max 2 thrusts each side = 4–8 thrusts]<br>AND<br>2 minutes suboccipital release, education, and exercise.<br>4 sessions over 4 weeks. | Sham to C0/C1 and C-1/2 [= 4 shams, same position for 15 seconds, no thrust]<br>AND<br>2 minutes suboccipital release, education, and exercise.<br>4 sessions over 4 weeks. | 1 week after baseline [visit 2]<br>End of treatment [visit 4, week 4] | Cervical ROM [seated flexion, extension, supine rotation]<br>inclinometer | There was an immediate change of ROM for cervical flexion of 1.44° in the HVLA group and 1.36° in the sham group, between baseline and one week 0.96° for the HVLA group, and 0° in the sham group and baseline and four weeks 5.12° in the HVLA group and 4.8° in the sham group. None was statistically significant.<br>There was an immediate change of ROM for cervical extension of 6.72° in the HVLA group and 4.92° in the sham group, between baseline and one week 4.24° for the HVLA group, and 3.04° in the sham group and baseline and four weeks 7.84° in the HVLA group and 3.52° in the sham group. None were statistically significant.<br>There was an immediate change of ROM for right cervical rotation of 2.2° in the HVLA group and 1.72° in the sham group, between baseline and one week 2.92° for the HVLA group and 2.88° in the sham group and baseline and four weeks 7.84° in the HVLA group and 4.44° in the sham group. None were statistically significant.<br>There was an immediate change of ROM for left cervical flexion rotation of 5.8° in the HVLA group and 1.44° in the sham group, between baseline and one week 6.24° for the HVLA group and -0.16° in the sham group and baseline and four weeks 8.08° in the HVLA group and 3.44° in the sham group. None was statistically significant.<br>No MDC was reported for cervical spine ROM | Some concerns |

(Continued)

Table 1. (Continued)

| Autor, Year | Participants<br>[A]Symptomatic<br>Age<br>Number | Treatment<br>region/<br>Region of<br>interest | Intervention | Control | Time to<br>assessment<br>[relative to<br>intervention] | Biomechanical<br>outcome<br>parameters | Main biomechanical results                                                                                                                                                                                                                                                                                          | RoB Rating |
|-------------|-------------------------------------------------|-----------------------------------------------|--------------|---------|--------------------------------------------------------|----------------------------------------|---------------------------------------------------------------------------------------------------------------------------------------------------------------------------------------------------------------------------------------------------------------------------------------------------------------------|------------|
|             |                                                 |                                               |              |         |                                                        |                                        | Effect sizes between groups:<br>Flexion:<br>Immediately: 0.01<br>1 week: 0.08<br>4 weeks: 0.03<br>Extension:<br>Immediately: 0.15<br>1 week: 0.09<br>4 weeks: 0.31<br>Rotation right:<br>Immediately: 0.07<br>1 week: 0.02<br>4 weeks: 0.32<br>Rotation left:<br>Immediately: 0.54<br>1 week: 0.69<br>4 weeks: 0.62 |            |

(Continued)

Table 1. (Continued)

| Autor, Year                 | Participants [A]Symptomatic Age Number                                                                                                                                                                      | Treatment region/Region of interest | Intervention                                    | Control                                                                                                                                                                                                   | Time to assessment [relative to intervention]       | Biomechanical outcome parameters                                                                                 | Main biomechanical results                                                                                                                                                                                                                                                                                                                                                                                                                                                                                                                                                                                                                                                                                                                                                                                                                                                                                                                                                                                                                                                       | RoB Rating |
|-----------------------------|-------------------------------------------------------------------------------------------------------------------------------------------------------------------------------------------------------------|-------------------------------------|-------------------------------------------------|-----------------------------------------------------------------------------------------------------------------------------------------------------------------------------------------------------------|-----------------------------------------------------|------------------------------------------------------------------------------------------------------------------|----------------------------------------------------------------------------------------------------------------------------------------------------------------------------------------------------------------------------------------------------------------------------------------------------------------------------------------------------------------------------------------------------------------------------------------------------------------------------------------------------------------------------------------------------------------------------------------------------------------------------------------------------------------------------------------------------------------------------------------------------------------------------------------------------------------------------------------------------------------------------------------------------------------------------------------------------------------------------------------------------------------------------------------------------------------------------------|------------|
| Valera-Calero et al. [2019] | Patients with mechanical neck pain of at least 3 months duration<br>HVL A group [n = 28]<br>35.6 ± 8.1<br>Mobilization group [n = 28]:<br>mean age 37.3 ± 10.5<br>Sham group [n = 27]:<br>Mean age 37 ± 8.9 | Cervical                            | HVL A to cervical spine [1 thrust]<br>1 session | Mobilization to the cervical spine [3x 1 minute]<br>1 session<br>OR<br>Sham manipulation to the cervical spine [same position as HVL A, no thrust, drop piece, as described by Vernon et al]<br>1 session | Immediately post-treatment<br>1 week post-treatment | Active cervical ROM [Flexion, extension, left and right lateral flexion, left and right rotation]<br>CROM device | Left rotation changed in the cervical manipulation group from pre-treatment [66.25°] to post-treatment [74.36°] and from post-treatment [74.36°] to 1-week follow-up [71.54°] - 2.82°. In the cervical mobilization group left rotation changed from pre-treatment [63.36°] to post-treatment [69.39°] 6.03° and from post-treatment [69.39°] to 1-week follow-up [65.11°] - 4.28°. In the sham group pre-treatment [62.52°] to post treatment [68.11°] 5.59° and from post treatment [68.11°] to 1-week follow-up [68.78°] - 0.67°. Right rotation changed in the cervical manipulation group from pre-treatment [61.86°] to post treatment [72.29°] 10.43° and from post treatment [72.29°] to 1-week follow-up [70.93°] - 1.36°. In the cervical mobilization group right rotation changed from pre-treatment [65.00°] to post-treatment [68.14°] 3.14° and from post-treatment [68.14°] to 1-week follow-up [66.57°] - 1.57°. In the sham group pre-treatment [64.26°] to post-treatment [68.74°] 4.48° and from post treatment [68.74°] to 1-week follow-up [71.70°] 2.96°. | Low risk   |

(Continued)

Table 1. (Continued)

| Autor, Year | Participants [A]Symptomatic Age Number | Treatment region/Region of interest | Intervention | Control | Time to assessment [relative to intervention] | Biomechanical outcome parameters | Main biomechanical results                                                                                                                                                                                                                                                                                                                                                                                                                                                                                                                                                                                                                                                                                                                                                                                                                                                                                                                                                                                                                                             | RoB Rating |
|-------------|----------------------------------------|-------------------------------------|--------------|---------|-----------------------------------------------|----------------------------------|------------------------------------------------------------------------------------------------------------------------------------------------------------------------------------------------------------------------------------------------------------------------------------------------------------------------------------------------------------------------------------------------------------------------------------------------------------------------------------------------------------------------------------------------------------------------------------------------------------------------------------------------------------------------------------------------------------------------------------------------------------------------------------------------------------------------------------------------------------------------------------------------------------------------------------------------------------------------------------------------------------------------------------------------------------------------|------------|
|             |                                        |                                     |              |         |                                               |                                  | <p>Extension changed in the cervical manipulation group from pre-treatment [55.14°] to post-treatment [58.54°] 3.4° and from post-treatment [58.54°] to 1-week follow-up [57.86°] – 0.68°. In the cervical mobilization group, extension changed from pre-treatment [54.07°] to post-treatment [55.79°] 1.72° and from post-treatment [55.79°] to 1-week follow-up [56.21°] 0.42°. In the sham group pre-treatment [57.15°] to post-treatment [53.11°] – 4.04° and from post-treatment [53.11°] to 1-week follow-up [54.44°] 1.33°. Flexion changed in the cervical manipulation group from pre-treatment [59.68°] to post-treatment [64.82°] 5.14° and from post-treatment [64.82°] to 1-week follow-up [62.61°] – 2.21°. In the cervical mobilization group flexion changed from pre-treatment [54.75°] to post-treatment [56.46°] 1.71° and from post-treatment [56.46°] to 1-week follow-up [51.89°] – 4.57°. In the sham group pre-treatment [57.52°] to post-treatment [56.15°] – 4.04° and from post treatment [56.15°] to 1-week follow-up [56.67°] 0.52°.</p> |            |

(Continued)

Table 1. (Continued)

| Autor, Year | Participants [A]Symptomatic Age Number | Treatment region/Region of interest | Intervention | Control | Time to assessment [relative to intervention] | Biomechanical outcome parameters | Main biomechanical results                                                                                                                                                                                                                                                                                                                                                                                                                                                                                                                                                                                                                                                                                                                                                                                                                                                                                                                                                                                                                                                                                                                                                                                                                                                        | RoB Rating |
|-------------|----------------------------------------|-------------------------------------|--------------|---------|-----------------------------------------------|----------------------------------|-----------------------------------------------------------------------------------------------------------------------------------------------------------------------------------------------------------------------------------------------------------------------------------------------------------------------------------------------------------------------------------------------------------------------------------------------------------------------------------------------------------------------------------------------------------------------------------------------------------------------------------------------------------------------------------------------------------------------------------------------------------------------------------------------------------------------------------------------------------------------------------------------------------------------------------------------------------------------------------------------------------------------------------------------------------------------------------------------------------------------------------------------------------------------------------------------------------------------------------------------------------------------------------|------------|
|             |                                        |                                     |              |         |                                               |                                  | <p>Left lateral flexion changed in the cervical manipulation group from pre-treatment [37.82°] to post-treatment [38.71°] 0.89° and from post-treatment [38.71°] to 1-week follow-up [39.14°] 0.43°. In the cervical mobilization group, left lateral flexion changed from pre-treatment [39.57°] to post-treatment [41.29°] 1.72° and from post-treatment [41.29°] to 1-week follow-up [40.25°] - 1.04°. In the sham group, pre-treatment [38.00°] to post-treatment [37.89°] -0.11° and from post-treatment [37.89°] to 1-week follow-up [34.74°] - 3.42°.</p> <p>Right lateral flexion changed in the cervical manipulation group from pre-treatment [40.11°] to post-treatment [39.11°] - 1.0° and from post-treatment [39.11°] to 1-week follow-up [40.11°] 1.0°. In the cervical mobilization group, left lateral flexion changed from pre-treatment [37.21°] to post-treatment [37.21°] 0° and from post-treatment [37.21°] to 1-week follow-up [36.46°] - 0.75°. In the sham group, pre-treatment [37.96°] to post-treatment [36.44°] - 1.52° and from post-treatment [36.44°] to 1-week follow-up [35.33°] - 1.11°.</p> <p>Significant interaction effect for flexion [<math>p = 0.015</math>] and right rotation [<math>P = 0.001</math>] with medium effect sizes.</p> |            |

(Continued)

Table 1. (Continued)

| Autor, Year | Participants<br>[A]Symptomatic<br>Age<br>Number | Treatment<br>region/<br>Region of<br>interest | Intervention | Control | Time to<br>assessment<br>[relative to<br>intervention] | Biomechanical<br>outcome<br>parameters | Main biomechanical results                                                                                                                                                                                                                                                                                                                                                                                                                                                                                                                                                                                                                                                                                                                                                                                                                                                                                                                                                                                                                                                                                                                                                              | RoB Rating |
|-------------|-------------------------------------------------|-----------------------------------------------|--------------|---------|--------------------------------------------------------|----------------------------------------|-----------------------------------------------------------------------------------------------------------------------------------------------------------------------------------------------------------------------------------------------------------------------------------------------------------------------------------------------------------------------------------------------------------------------------------------------------------------------------------------------------------------------------------------------------------------------------------------------------------------------------------------------------------------------------------------------------------------------------------------------------------------------------------------------------------------------------------------------------------------------------------------------------------------------------------------------------------------------------------------------------------------------------------------------------------------------------------------------------------------------------------------------------------------------------------------|------------|
|             |                                                 |                                               |              |         |                                                        |                                        | <p>Significant increase in flexion immediately post-treatment in the HVLA group, significantly greater vs cervical mobilization and sham [P=0.001] and in HVLA vs sham at one week follow up [P=0.001]. Significant increase in right rotation immediately post-treatment in HVLA [P&lt;0.001] and sham manipulation [P=0.009], improvement in right rotation reversed at one week for cervical HVLA [P&lt;0.001], remained for sham [P=0.001]. No MDC was reported. Effect sizes between groups:</p> <p>Left rotation:<br/>Immediately:<br/>Cervical man vs cervical mob: 1.09<br/>Cervical man vs sham: 1.32<br/>Cervical mob vs sham: 0.23<br/>1 week:<br/>Cervical man vs cervical mob: 2.03<br/>Cervical man vs sham: -0.42<br/>Cervical mob vs sham: -2.45</p> <p>Right rotation:<br/>Immediately:<br/>Cervical man vs cervical mob: 3.98<br/>Cervical man vs sham: 3.25<br/>Cervical mob vs sham: -0.73<br/>1 week:<br/>Cervical man vs cervical mob: 4.90<br/>Cervical man vs sham: 1.07<br/>Cervical mob vs sham: -3.84</p> <p>Extension<br/>Immediately:<br/>Cervical man vs cervical mob: 0.66<br/>Cervical man vs sham: 1.86<br/>Cervical mob vs sham: 1.20<br/>1 week:</p> |            |

(Continued)

| Autor, Year          | Participants<br>[A]Symptomatic<br>Age<br>Number                                                                                                       | Treatment<br>region/<br>Region of<br>interest | Intervention                                    | Control                                                                                                  | Time to<br>assessment<br>[relative to<br>intervention] | Biomechanical<br>outcome<br>parameters | Main biomechanical results                                                                                                                                                                                                                                                                                                                                                                                                                                                                                                                                                                                                                                                                                                                                                                                                                                                                                                                                       | RoB Rating |
|----------------------|-------------------------------------------------------------------------------------------------------------------------------------------------------|-----------------------------------------------|-------------------------------------------------|----------------------------------------------------------------------------------------------------------|--------------------------------------------------------|----------------------------------------|------------------------------------------------------------------------------------------------------------------------------------------------------------------------------------------------------------------------------------------------------------------------------------------------------------------------------------------------------------------------------------------------------------------------------------------------------------------------------------------------------------------------------------------------------------------------------------------------------------------------------------------------------------------------------------------------------------------------------------------------------------------------------------------------------------------------------------------------------------------------------------------------------------------------------------------------------------------|------------|
| Vernon et al. [2012] | Patients with mechanical neck pain > 3 months<br>HVLA group<br>[n = 32;<br>mean age<br>38.3 ± 9.9]<br>Sham group<br>[n = 32; mean age<br>38.8 ± 11.3] | Cervical                                      | HVLA to cervical spine [each side]<br>1 session | Sham to cervical spine [each side, same positioning, no thrust, use of drop to mimic sound]<br>1 session | 5 and 15 mins posttreatment                            | Cervical ROM [all 3 cardinal planes]   | <p>Cervical man vs cervical mob: 0.23</p> <p>Cervical man vs sham: 2.13</p> <p>Cervical mob vs sham: 1.90</p> <p>Flexion</p> <p>Immediately:<br/>Cervical man vs cervical mob: 2.20</p> <p>Cervical man vs sham: 4.18</p> <p>Cervical mob vs sham: 1.98</p> <p>1 week:<br/>Cervical man vs cervical mob: 3.71</p> <p>Cervical man vs sham: 2.42</p> <p>Cervical mob vs sham: -1.29</p> <p>Left lateral flexion</p> <p>Immediately:<br/>Cervical man vs cervical mob: -0.59</p> <p>Cervical man vs sham: 0.70</p> <p>Cervical mob vs sham: 1.29</p> <p>1 week<br/>Cervical man vs cervical mob: 0.40</p> <p>Cervical man vs sham: 2.91</p> <p>Cervical mob vs sham: 2.52</p> <p>Right lateral flexion:<br/>Immediately:<br/>Cervical man vs cervical mob: -0.68</p> <p>Cervical man vs sham: 0.58</p> <p>Cervical mob vs sham: 1.25</p> <p>1 Week:<br/>Cervical man vs cervical mob: 0.50</p> <p>Cervical man vs sham: 1.74</p> <p>Cervical mob vs sham: 1.24</p> | Low risk   |

| Author, Year                   | Participants<br>[A]Symptomatic<br>Age<br>Number                                                                                                                                                       | Treatment<br>region/<br>Region of<br>interest | Intervention                                                                                 | Control                                                                                   | Time to<br>assessment<br>[relative to<br>intervention]                                          | Biomechanical<br>outcome<br>parameters                                                             | Main biomechanical results                                                                                                                                                                                                                                                                                                                                                                                                                                                                                                                                                                                                                                                                                                                                                                                                                                                                                                                                                                                                                                                                                                                                                                                                                                                                                                                                                                 | RoB Rating |
|--------------------------------|-------------------------------------------------------------------------------------------------------------------------------------------------------------------------------------------------------|-----------------------------------------------|----------------------------------------------------------------------------------------------|-------------------------------------------------------------------------------------------|-------------------------------------------------------------------------------------------------|----------------------------------------------------------------------------------------------------|--------------------------------------------------------------------------------------------------------------------------------------------------------------------------------------------------------------------------------------------------------------------------------------------------------------------------------------------------------------------------------------------------------------------------------------------------------------------------------------------------------------------------------------------------------------------------------------------------------------------------------------------------------------------------------------------------------------------------------------------------------------------------------------------------------------------------------------------------------------------------------------------------------------------------------------------------------------------------------------------------------------------------------------------------------------------------------------------------------------------------------------------------------------------------------------------------------------------------------------------------------------------------------------------------------------------------------------------------------------------------------------------|------------|
| Whittingham and Nilsson [2001] | Patients with cervicogenic headache > 6 months<br>Group 1 [n = 49]:<br>mean age<br>39.4 ± 11.6 yrs]<br>[sham, HVLA, washout]<br>Group 2 [n = 56]<br>mean age<br>41.9 ± 12.5]<br>[HVLA, washout, sham] | Cervical                                      | HVLA to the upper cervical spine [single thrust, toggle recoil manipulation]<br>3 times/week | Sham to the cervical spine [single sham, deactivated Pettibon instrument]<br>3 times/week | At the end of each phase, baseline obs. weeks 3, 6, 9, 12, at the end of the intervention phase | Active cervical ROM [left/right-lateral flexion, left/right rotation]<br>Goniometer [inclinomater] | In the manipulation group, right rotation changed from 57° at baseline over 57° [week 3], 67° [week 6], 69° [week 9] to 70° [week 12]. Left rotation changed from 54° at baseline over 55° [week 3], 67° [week 6], 68° [week 9] to 69° [week 12]. In the manipulation group, right-lateral flexion changed from 38° at baseline over 37° [week 3], 46° [week 6], 46° [week 9] to 47° [week 12]. In the manipulation group, left lateral flexion changed from 36° at baseline over 36° [week 3], 44° [week 6], 44° [week 9] to 45° [week 12]. In the sham group, right rotation changed from 56° at baseline over 56° [week 3], 57° [week 6], 73° [week 9] to 73° [week 12]. Left rotation changed from 54° at baseline over 54° [week 3], 56° [week 6], 71° [week 9] to 72° [week 12]. In the manipulation group, right-lateral flexion changed from 39° at baseline over 39° [week 3], 39° [week 6], 48° [week 9] to 40° [week 12]. In the manipulation group, left lateral flexion changed from 38° at baseline over 38° [week 3], 39° [week 6], 47° [week 9] to 47° [week 12]. All four ROM measures significantly [p < 0.006] improved by treatment; no change by sham treatment. No direct statistical comparison between groups [i.e., no time x group interaction effect] was reported. Strength: The cross-over design shows similar behavior in both groups. No MDC was reported. | Low risk   |

Table 1. (Continued)

| Autor, Year                      | Participants [A]Symptomatic Age Number                                                                                                               | Treatment region/ Region of interest | Intervention                                                                                                   | Control                                                                                                                                                             | Time to assessment [relative to intervention] | Biomechanical outcome parameters                                                 | Main biomechanical results                                                                                                                                                                                                                                                                                                                                                                                                                                      | RoB Rating |
|----------------------------------|------------------------------------------------------------------------------------------------------------------------------------------------------|--------------------------------------|----------------------------------------------------------------------------------------------------------------|---------------------------------------------------------------------------------------------------------------------------------------------------------------------|-----------------------------------------------|----------------------------------------------------------------------------------|-----------------------------------------------------------------------------------------------------------------------------------------------------------------------------------------------------------------------------------------------------------------------------------------------------------------------------------------------------------------------------------------------------------------------------------------------------------------|------------|
|                                  |                                                                                                                                                      |                                      |                                                                                                                |                                                                                                                                                                     |                                               |                                                                                  | Effect sizes between groups:<br>Right rotation:<br>Week 0: -0.69<br>Week 3: -0.67<br>Week 6: -7.67<br>Week 9: 2.91<br>Week 12: 2.49<br>Left rotation:<br>Week 0: 0.0<br>Week 3: -0.67<br>Week 6: -8.44<br>Week 9: 2.19<br>Week 12: 2.19<br>Right lateral flexion:<br>Week 0: 0.79<br>Week 3: 2.22<br>Week 6: -4.34<br>Week 9: 1.60<br>Week 12: -5.56<br>Left lateral flexion:<br>Week 0: 1.60<br>Week 3: 1.59<br>Week 6: -4.00<br>Week 9: 2.30<br>Week 12: 1.82 |            |
| <b>Thoracic and lumbar spine</b> |                                                                                                                                                      |                                      |                                                                                                                |                                                                                                                                                                     |                                               |                                                                                  |                                                                                                                                                                                                                                                                                                                                                                                                                                                                 |            |
| Kardouni et al. [2015]           | Patients with sub-acromial impingement syndrome > 6 weeks<br>HVL A group [n = 26: mean age 30.8 ± 11.9]<br>Sham group [n = 26: mean age 33.2 ± 12.6] | Thoracic                             | HVLA manipulation at the upper, middle, and lower thoracic spine 1 session, each region 2x [= 6 thrusts total] | Sham intervention [identical positioning, minimal pressure] at the upper, middle, and lower thoracic spine 1 session, each region 2x [= 6 sham interventions total] | posttreatment                                 | Active thoracic flexion to full extension] Electromagnetic motion capture system | Thoracic extension during arm elevation in the HVL A group changed from pre-treatment to post-treatment as follows:<br>30°: 0.6 to 0.1 [-0.5]<br>60°: 0.8 to 0.4 [-0.4]<br>90°: 1.0 to 0.7 [-0.4]<br>120°: 2.4 to 2.2 [-0.2]<br>Thoracic extension during arm elevation in the sham group changed from pre-treatment to post-treatment as follows:<br>120°: 1.6 to 1.6 [0]<br>90°: 1.8 to 1.8 [0]<br>60°: 2.3 to 1.9 [-0.4]<br>30°: 4.4 to 4.1 [-0.3]           | Low risk   |

(Continued)

Table 1. (Continued)

| Author, Year | Participants [A]Symptomatic Age Number | Treatment region/Region of interest | Intervention | Control | Time to assessment [relative to intervention] | Biomechanical outcome parameters | Main biomechanical results                                                                                                                                                                                                                                                                                                                                                                                                                                                                                                                                                                                                                                                                                                                                                                                                                                                                                                                                                                                                                                                                                                                                                                                 | RoB Rating |
|--------------|----------------------------------------|-------------------------------------|--------------|---------|-----------------------------------------------|----------------------------------|------------------------------------------------------------------------------------------------------------------------------------------------------------------------------------------------------------------------------------------------------------------------------------------------------------------------------------------------------------------------------------------------------------------------------------------------------------------------------------------------------------------------------------------------------------------------------------------------------------------------------------------------------------------------------------------------------------------------------------------------------------------------------------------------------------------------------------------------------------------------------------------------------------------------------------------------------------------------------------------------------------------------------------------------------------------------------------------------------------------------------------------------------------------------------------------------------------|------------|
|              |                                        |                                     |              |         |                                               |                                  | <p>Thoracic extension during arm lowering in the HVLA group changed from pretreatment to post-treatment as follows:<br/>           30°: 4.6 to 4.4 [-0.2]<br/>           60°: 2.9 to 2.5 [-0.4]<br/>           90°: 1.8 to 1.4 [-0.4]<br/>           120°: 1.5 to 1.0 [-0.5]</p> <p>Thoracic extension during arm lowering in the sham group changed from pretreatment to post-treatment as follows:<br/>           120°: 16.4 to 5.9 [-0.5]<br/>           90°: 4.4 to 4.2 [-0.1]<br/>           60°: 3.1 to 3.1 [0]<br/>           30°: 2.4 to 2.4 [0]</p> <p>MDC was reported for thoracic extension [1.4° - 2.1°]</p> <p>Thoracic extension in the HVLA group changed from 37.2° pre-treatment to 37.7° post-treatment, and in the sham group from 30.07 to 31.7°. No significant difference between the groups in thoracic extension.</p> <p>Effect Sizes between groups:<br/>           Rest: 0.20<br/>           Ascending 30°: 0.25<br/>           Ascending 60°: 0.24<br/>           Ascending 90°: 0.20<br/>           Ascending 120°: 0.32<br/>           Descending 30°: 0.28<br/>           Descending 60°: 0.33<br/>           Descending 90°: 0.32<br/>           Descending 120°: 0.25</p> |            |

(Continued)

Table 1. (Continued)

| Author, Year             | Participants [A]Symptomatic Age Number                                                                                                                                                                                                  | Treatment region/ Region of interest | Intervention                                                                                                                        | Control                                                                                              | Time to assessment [relative to intervention]            | Biomechanical outcome parameters                                                                              | Main biomechanical results                                                                                                                                                                                                                                                                                                                                                                                                                                                                        | RoB Rating   |
|--------------------------|-----------------------------------------------------------------------------------------------------------------------------------------------------------------------------------------------------------------------------------------|--------------------------------------|-------------------------------------------------------------------------------------------------------------------------------------|------------------------------------------------------------------------------------------------------|----------------------------------------------------------|---------------------------------------------------------------------------------------------------------------|---------------------------------------------------------------------------------------------------------------------------------------------------------------------------------------------------------------------------------------------------------------------------------------------------------------------------------------------------------------------------------------------------------------------------------------------------------------------------------------------------|--------------|
| Ditcharies et al. [2017] | Right-handed young healthy adults<br>HVL A group [n = 11: mean age 28 ± 4]<br>sham group [n = 11: mean age 29 ± 4]                                                                                                                      | Thoracic                             | HVLA to T9<br>1 session                                                                                                             | Sham intervention [light touch only, same position for 10 seconds]<br>1 session                      | Immediately post-treatment                               | Active thoracic and lumbar ROM [thoracic flexion/ extension and lumbar flexion/ extension]<br>2 inclinometers | A significant difference in thoracic flexion [main effect of GROUP] [F = 4.53, p < 0.05], CONDITION [F = 15.73, p < 0.01] and GROUP – CONDITION interaction [F = 14.55, p < 0.01]. Post-hoc: Significant improvement in the SMT group, no change in the control group. No significant effect on any of the other ROM values. No effect sizes could be calculated due to lack of detailed reporting of ROM data. No MDC was reported.                                                              | Low risk     |
| Nambi et al. [2018]      | Patients with untreated uncompliated chronic low back pain, lumbago, sciatica [above knee], with pain localized in L4/L5<br>HVL A group [n = 110]<br>Laser group [n = 110]<br>Control group [n = 110]<br>Age: > 18 years, no mean given | Lumbar                               | HVLA to L4/5 [maximum of 2 thrusts on each side]<br>AND laser therapy<br>AND conventional exercises<br>3 sessions/ week for 4 weeks | Laser therapy AND Conventional exercises<br>OR Conventional exercises<br>3 sessions/week for 4 weeks | 4 weeks [end of treatment duration], 6 months, 12 months | Active lumbar ROM [flexion by modified Schober test]                                                          | The modified Schober changed in the HVL A group from 17.39° at baseline to 18.67° [four weeks], 19.17° [6 months], 20.22° [12 months]. In the therapy group, the modified Schober changed from 17.25° at baseline to 18.10° [four weeks], 18.67° [6 months], and 19.48° [12 months]. The time and group interaction for modified Schober was significant [p < 0.05]. No MDC was reported. Effect sizes between groups<br>Baseline: -0.24<br>4 weeks: -1.23<br>6 months: -0.55<br>12 months: -1.08 | Some concern |

(Continued)

Table 1. (Continued)

| Autor, Year            | Participants [A]Symptomatic Age Number                                                                                                | Treatment region/Region of interest | Intervention                                                                         | Control                     | Time to assessment [relative to intervention] | Biomechanical outcome parameters                                                                          | Main biomechanical results                                                                                                                                                                                                                                                                                                                                                                                                                                                                                                                                                                                                                                                                                                                                                                                                                                                                                                                                                                                                                                                         | RoB Rating   |
|------------------------|---------------------------------------------------------------------------------------------------------------------------------------|-------------------------------------|--------------------------------------------------------------------------------------|-----------------------------|-----------------------------------------------|-----------------------------------------------------------------------------------------------------------|------------------------------------------------------------------------------------------------------------------------------------------------------------------------------------------------------------------------------------------------------------------------------------------------------------------------------------------------------------------------------------------------------------------------------------------------------------------------------------------------------------------------------------------------------------------------------------------------------------------------------------------------------------------------------------------------------------------------------------------------------------------------------------------------------------------------------------------------------------------------------------------------------------------------------------------------------------------------------------------------------------------------------------------------------------------------------------|--------------|
| Passmore et al. [2019] | Patients with degenerative lumbar spinal stenosis HVLA group [n = 7: mean age 59.1 ± 9.3] Control group [n = 7: mean age 58.9 ± 12.6] | Lumbar                              | HVLA to the lumbar spine [bilateral, hypothenar lumbar pull, side posture] 1 session | Waiting 5 minutes 1 session | Post-treatment                                | Active lumbar ROM [flexion, extension, left/right lateral flexion, left/right rotation] Electrogoniometry | Flexion in the HVLA group changed from pre-HVLA 20.09° to post-HVLA 24.7° and in the sham group from 26.2° to 22.09°. Extension in the HVLA group changed from pre-HVLA 19.4° to post-HVLA 21.9° and in the sham group from 23.3° to 20.7°. Left lateral flexion in the HVLA group changed from pre-HVLA 16.3° to post-HVLA 20.4°, and in the sham group from 18.9° to 21°. Right lateral flexion in the HVLA group changed from pre-HVLA 15.9° to post-HVLA 18.7° and in the sham group from 17.9° to 20.9°. Left rotation in the HVLA group changed from pre-HVLA 11.3° to post-HVLA 25.7° and in the sham group from 11.7° to 10.7°. Right rotation in the HVLA group changed from pre-HVLA 15.7° to post-HVLA 13.4°, and in the sham group from 10.4° to 10.3°. No difference within or between groups in lumbar ROM posttreatment based upon exploratory analysis.<br>No MDC was reported<br>Effect sizes between groups:<br>Flexion: -0.16<br>Extension: -0.12<br>Left lateral flexion: 0.08<br>Right lateral flexion: 0.25<br>Left rotation: -0.65<br>Right rotation: -0.29 | Some concern |

<https://doi.org/10.1371/journal.pone.0328048.t001>

Table 2. Regional effects of HVLA thrust on range of motion.

| Autor, Year                      | Participants [A]Symptomatic Age Number                                                                                                                                                       | Treatment region/ Region of interest | Intervention                                                                                                                                           | Control                                                                             | Time to assessment [relative to intervention] | Biomechanical outcome parameters                                                                      | Main biomechanical Results                                                                                                                                                                                                                                                                                                                                                                                                                                                                                                                                                                                                                                                                                                                                                                                                                                                                                                                                                                                                                                                                                                          | RoB Rating    |
|----------------------------------|----------------------------------------------------------------------------------------------------------------------------------------------------------------------------------------------|--------------------------------------|--------------------------------------------------------------------------------------------------------------------------------------------------------|-------------------------------------------------------------------------------------|-----------------------------------------------|-------------------------------------------------------------------------------------------------------|-------------------------------------------------------------------------------------------------------------------------------------------------------------------------------------------------------------------------------------------------------------------------------------------------------------------------------------------------------------------------------------------------------------------------------------------------------------------------------------------------------------------------------------------------------------------------------------------------------------------------------------------------------------------------------------------------------------------------------------------------------------------------------------------------------------------------------------------------------------------------------------------------------------------------------------------------------------------------------------------------------------------------------------------------------------------------------------------------------------------------------------|---------------|
| Erdem et al. [2021]              | 80 male participants with chronic mechanical (> 3 months) neck pain With or without arm pain 18-25 years Manipulation group [n = 50: median age 20] Control group [n = 30: median age: 20.5] | Thoracic spine                       | Single session of thoracic manipulation                                                                                                                | Rest for 5 minutes                                                                  | Immediately post-intervention                 | Active cervical flexion, extension, lateral flexion, and rotation [CROM device]                       | Range of motion changed from pre to post-intervention in the HVLA group for flexion 2°, for Extension 2° for left lateral flexion 2°, for right lateral flexion 2° for left rotation 2° and for right rotation 2°. For the control group, flexion changed 0°, extension 2°, left lateral flexion 2°, right lateral flexion 3.5°, left rotation 2° and right rotation 2°. A statistically significant difference between groups for flexion and right rotation. No effect sizes could be calculated due to lack of detailed reporting of ROM data.<br>No MDC was reported.                                                                                                                                                                                                                                                                                                                                                                                                                                                                                                                                                           | Some concerns |
| González-Iglesias et al. [2009a] | Patients with acute mechanical neck pain < 1 month HVLA group [n = 23: mean age 34 ± 5] Control group [n = 22: mean age 34 ± 6]                                                              | Thoracic                             | HVLA to thoracic spine [maximum 2 thrusts] 1x/week for 3 weeks AND Superficial thermo- and electro-therapy and soft tissue massage 2x/week for 3 weeks | Superficial thermo- and electro-therapy and soft tissue massage 2x/week for 3 weeks | 1-week post-treatment                         | Active cervical ROM [flexion, extension, right/left lateral flexion, right/left rotation] CROM Device | In the control group, cervical flexion changed 0.9° from 44.7° to 45.6°. Cervical extension changed by 1.3°, from 58.8° to 60.1°. Left lateral flexion changed by 1.4°, from 40.2° to 41.6°. Right lateral-flexion changed by 1.6°, from 39.4° to 41.0°. Left rotation changed by 0.6°, from 57.8° to 58.4° and right rotation changed by 0.2°, from 56.1° to 56.3°. In the HVLA group cervical flexion changed by 11.6°, from 45.6° to 57.2°. Cervical extension changed by 11.3°, from 59.1° to 70.3°. Left lateral flexion changed by 9.4°, from 39.1° to 48.5°, right lateral-flexion changed by 11°, from 36.2° to 47.2. Left rotation changed by 9°, from 59.2° to 68.2°. Finally, right rotation changed by 9.8°, from 55.8.1° to 65.6°. There was greater improvement in all ROM measures for the treatment group compared to the control group [all p < 0.001] with large effect sizes.<br>Effect Sizes between Groups:<br>Cervical flexion: 2.07<br>Cervical extension: 1.46<br>Left lateral flexion: 1.39<br>Right lateral flexion: 1.25<br>Left rotation: 1.71<br>Right rotation: 1.34<br>No MDC was reported for CROM. | Low risk      |

(Continued)

Table 2. (Continued)

| Author, Year           | Participants [A]Symptomatic Age Number                                                                                                                                                                                     | Treatment region/ Region of interest | Intervention                                                     | Control                                                                                                                                                                                              | Time to assessment [relative to intervention]     | Biomechanical outcome parameters                                                                        | Main biomechanical Results                                                                                                                                                                                                                                                                                                                                                                                                                                                                                                                                                                                                                                                                                                                                                                                                                                                                                                                                                                 | RoB Rating |
|------------------------|----------------------------------------------------------------------------------------------------------------------------------------------------------------------------------------------------------------------------|--------------------------------------|------------------------------------------------------------------|------------------------------------------------------------------------------------------------------------------------------------------------------------------------------------------------------|---------------------------------------------------|---------------------------------------------------------------------------------------------------------|--------------------------------------------------------------------------------------------------------------------------------------------------------------------------------------------------------------------------------------------------------------------------------------------------------------------------------------------------------------------------------------------------------------------------------------------------------------------------------------------------------------------------------------------------------------------------------------------------------------------------------------------------------------------------------------------------------------------------------------------------------------------------------------------------------------------------------------------------------------------------------------------------------------------------------------------------------------------------------------------|------------|
| Krauss et al. [2008]   | Patients with cervical pain<br>HVLA group<br>[n = 22;<br>mean age<br>35.0 ± 10.5]<br>Control group<br>[n = 10;<br>Mean age<br>34.2 ± 9.6]                                                                                  | Thoracic                             | HVLA to upper thoracic spine [T1-T4]<br>1 session                | No intervention, seated for equal time                                                                                                                                                               | Immediately posttreatment                         | Active cervical ROM [left/right rotation]<br>CROM                                                       | Within group changes of left rotation in the control group were -0.6° and 7.09° in the HVLA group. For right rotation, it was -0.1° in the control group and 8.23° in the HVLA group. Statistically significant GROUP x TIME interaction for right rotation and left rotation [p < 0.05 in favor of SMT.<br>No effect sizes could be calculated due to lack of detailed reporting of ROM data.<br>MDC reported for right and left rotation.                                                                                                                                                                                                                                                                                                                                                                                                                                                                                                                                                | Low risk   |
| Suvarnato et al [2013] | Patients with chronic mechanical neck pain > 3 months<br>HVLA group:<br>[n = 13; mean age<br>37.0 ± 12.5]<br>Mobilization group<br>[n = 13; mean age<br>39.9 ± 11.5]<br>Control group<br>[n = 13; mean age<br>35.3 ± 11.0] | Thoracic                             | HVLA to thoracic spine [T6/7, maximum of 2 thrusts]<br>1 session | Mobilization group:<br>Single-level thoracic mobilization to T6/7<br>[both sides, grade III, 1 minute]<br>OR<br>Control group:<br>Prone position, clinician hands on T6/7 for 2 minutes<br>1 session | Immediate posttreatment 24 hours<br>posttreatment | Active cervical ROM [flexion/extension, left/right lateral flexion, left/right rotation]<br>CROM device | In the control group cervical flexion changed -1.95° from 60.57° to 58.62° from baseline to immediately after treatment and -0.26° from immediately after treatment to 24 hours follow-up. Cervical extension changed by 2.31°, from 47.64 to 49.95 from baseline to immediately after treatment and by -0.67° from 49.95° to 49.28° from immediately after treatment to 24 hours follow-up. Left lateral flexion changed by 1.81°, from 33.03° to 34.84° from baseline to immediately after treatment and -0.74° from 34.84 to 34.10° from immediate after treatment to 24 hours follow-up. Right lateral-flexion changed by 1.54°, from 31.54° to 33.08° from baseline to immediately after treatment and 0.74° from 33.08 to 33.82° from immediately after treatment to 24 hours follow-up. Left rotation changed by 1.39°, from 53.79° to 55.18° from baseline to immediately after treatment and -1.28° from 55.18° to 53.90° from immediately after treatment to 24 hours follow-up. | Low risk   |

(Continued)

Table 2. (Continued)

| Autor, Year | Participants<br>[A]Symptomatic<br>Age<br>Number | Treatment<br>region/<br>Region of<br>interest | Intervention | Control | Time to<br>assessment<br>[relative to<br>intervention] | Biomechanical<br>outcome<br>parameters | Main biomechanical Results                                                                                                                                                                                                                                                                                                                                                                                                                                                                                                                                                                                                                                                                                                                                                                                                                                                                                                                                                                                                                                                                                                                                                                                                                                                                                                                                                                                                                                                                                                                                                                                                                                                                                                                                                                                                 | RoB Rating |
|-------------|-------------------------------------------------|-----------------------------------------------|--------------|---------|--------------------------------------------------------|----------------------------------------|----------------------------------------------------------------------------------------------------------------------------------------------------------------------------------------------------------------------------------------------------------------------------------------------------------------------------------------------------------------------------------------------------------------------------------------------------------------------------------------------------------------------------------------------------------------------------------------------------------------------------------------------------------------------------------------------------------------------------------------------------------------------------------------------------------------------------------------------------------------------------------------------------------------------------------------------------------------------------------------------------------------------------------------------------------------------------------------------------------------------------------------------------------------------------------------------------------------------------------------------------------------------------------------------------------------------------------------------------------------------------------------------------------------------------------------------------------------------------------------------------------------------------------------------------------------------------------------------------------------------------------------------------------------------------------------------------------------------------------------------------------------------------------------------------------------------------|------------|
|             |                                                 |                                               |              |         |                                                        |                                        | <p>Right rotation changed by 1.64°, from 55.28° to 56.92° from baseline to immediately after treatment and 0.46° from 56.92° to 57.38° from immediately after treatment to 24 hours follow-up. In the HVLA group cervical flexion changed by 4.97°, from 55.08° to 60.05° from baseline to immediately after treatment and 0.31° from 60.05° to 60.36° immediately after treatment to 24 hours follow-up. Cervical extension changed by 7.8°, from 48.51 to 56.31 from baseline to immediately after treatment and -2.1° from 56.31° to 54.21° from immediately after treatment to 24 hours follow-up. Left lateral-flexion changed by 5.64°, from 32.77° to 38.41° from baseline to immediately after treatment and -0.15° from 38.41 to 38.26° from immediately after treatment to 24 hours follow-up. Right lateral flexion changed by 4.72, from 33.33° to 38.05° from baseline to immediately after treatment and 1.23° from 38.05 to 36.82° from immediately after treatment to 24 hours follow-up. Left rotation changed by 9.29°, from 53.33° to 62.62° from baseline to immediately after treatment and -1.03° from 62.62° to 61.59° from immediately after treatment to 24 hours follow-up. Right rotation changed by 6.51°, from 55.54° to 62.05° from baseline to immediately after treatment and -1.18° from 62.05° to 60.87° from immediately after treatment to 24 hours follow-up. In the mobilization group, cervical flexion changed by 3.84°, from 59.44° to 63.28° from baseline to immediately after treatment and -1.64° from 63.28° to 61.64° immediately after treatment to 24 hours follow-up. Cervical extension changed by 2.51°, from 58.82 to 61.33 from baseline to immediately after treatment and -3.18° from 61.33° to 58.15° from immediately after treatment to 24 hours follow-up.</p> |            |

(Continued)

Table 2. (Continued)

| Autor, Year | Participants<br>[A]Symptomatic<br>Age<br>Number | Treatment<br>region/<br>Region of<br>interest | Intervention | Control | Time to<br>assessment<br>[relative to<br>intervention] | Biomechanical<br>outcome<br>parameters | Main biomechanical Results                                                                                                                                                                                                                                                                                                                                                                                                                                                                                                                                                                                                                                                                                                                                                                                                                                                                                                                                                                                                                                                                                                                                                                                                                                                                                                                                                                                                                                                                                                                          | RoB Rating |
|-------------|-------------------------------------------------|-----------------------------------------------|--------------|---------|--------------------------------------------------------|----------------------------------------|-----------------------------------------------------------------------------------------------------------------------------------------------------------------------------------------------------------------------------------------------------------------------------------------------------------------------------------------------------------------------------------------------------------------------------------------------------------------------------------------------------------------------------------------------------------------------------------------------------------------------------------------------------------------------------------------------------------------------------------------------------------------------------------------------------------------------------------------------------------------------------------------------------------------------------------------------------------------------------------------------------------------------------------------------------------------------------------------------------------------------------------------------------------------------------------------------------------------------------------------------------------------------------------------------------------------------------------------------------------------------------------------------------------------------------------------------------------------------------------------------------------------------------------------------------|------------|
|             |                                                 |                                               |              |         |                                                        |                                        | <p>Left lateral-flexion changed by 3.49°, from 36.41° to 39.90° from baseline to immediately after treatment and -2.05° from 39.90 to 37.85° from immediately after treatment to 24 hours follow-up. Right lateral-flexion changed by 2.72, from 38.97° to 41.69° from baseline to immediately after treatment and 1.38° from 41.69° to 40.31° from immediately after treatment to 24 hours follow-up. Left rotation changed 4.15° from 57.54° to 61.69° from baseline to immediately after treatment and 2.16° from 61.69° to 63.85° from immediately after treatment to 24 hours follow-up. Right rotation changed by 6.26°, from 58.41° to 64.67° from baseline to immediately after treatment and 0.43° from 64.67° to 65.10° from immediately after treatment to 24 hours follow-up.</p> <p>Significant increase in CROM for the HVLA group from baseline Immediate: HVLA compared to control: significant increase in flexion, extension, left and right lateral flexion, and left rotation [p&lt;0.05].</p> <p>HVLA compared to mobilization: significant increase in extension and left rotation [p&lt;0.05].</p> <p>24 hours-follow up:</p> <p>HVLA versus control: significant improvement in flexion, left lateral flexion, and left rotation [p&lt;0.05].</p> <p>HVLA compared to mobilization: no significant differences.</p> <p>Effect sizes between groups:</p> <p>Flexion:<br/>Control group vs manipulation group: Immediate: -0.1<br/>24 hrs: -0.2<br/>Control group vs mobilisation group: Immediate: -0.5<br/>24 hrs: -0.3</p> |            |

(Continued)

Table 2. (Continued)

| Author, Year | Participants [A]Symptomatic Age Number | Treatment region/ Region of interest | Intervention | Control | Time to assessment [relative to intervention] | Biomechanical outcome parameters | Main biomechanical Results                                                                                                                                                                                                                                                                                                                                                                                                                                                                                                                                                                                                                                                                                                                                                                                                                                                                                                                                                                                                                                                                                                                                                                                                                                                                                                                                                                                                                                                                                     | RoB Rating |
|--------------|----------------------------------------|--------------------------------------|--------------|---------|-----------------------------------------------|----------------------------------|----------------------------------------------------------------------------------------------------------------------------------------------------------------------------------------------------------------------------------------------------------------------------------------------------------------------------------------------------------------------------------------------------------------------------------------------------------------------------------------------------------------------------------------------------------------------------------------------------------------------------------------------------------------------------------------------------------------------------------------------------------------------------------------------------------------------------------------------------------------------------------------------------------------------------------------------------------------------------------------------------------------------------------------------------------------------------------------------------------------------------------------------------------------------------------------------------------------------------------------------------------------------------------------------------------------------------------------------------------------------------------------------------------------------------------------------------------------------------------------------------------------|------------|
|              |                                        |                                      |              |         |                                               |                                  | <p>Manipulation group vs mobilisation group:<br/>           Immediate: -0.4<br/>           24 hrs: -0.1<br/>           Extension:<br/>           Control vs manipulation:<br/>           Immediate: -0.4<br/>           24 hrs: 0.3<br/>           Control vs mobilisation:<br/>           Immediate: -0.8<br/>           24 hrs: 0.0<br/>           Manipulation vs mobilisation:<br/>           Immediate: -0.4<br/>           24 hrs: -0.3<br/>           Left lateral flexion:<br/>           Control vs manipulation:<br/>           Immediate: -0.422<br/>           24 hrs: -0.549<br/>           Control vs mobilisation:<br/>           Immediate: -0.687<br/>           24 hrs: -0.545<br/>           Manipulation vs mobilisation:<br/>           Immediate: -0.200<br/>           24 hrs: 0.066<br/>           Right lateral flexion:<br/>           Control vs manipulation:<br/>           Immediate: -0.6<br/>           24 hrs: -0.4<br/>           Control vs mobilisation:<br/>           Immediate: -1.2<br/>           24 hrs: -1.2<br/>           Manipulation vs mobilisation:<br/>           Immediate: -0.5<br/>           24 hrs: -0.5<br/>           Left rotation:<br/>           Control vs manipulation:<br/>           Immediate: -0.6<br/>           24 hrs: -0.6<br/>           Control vs mobilisation:<br/>           Immediate: -0.5<br/>           24 hrs: -0.8<br/>           Manipulation vs mobilisation:<br/>           Immediate: 0.1<br/>           24 hrs: -0.2</p> |            |

(Continued)

Table 2. (Continued)

| Author, Year        | Participants [A]Symptomatic Age Number                                                                                                                  | Treatment region/ Region of interest | Intervention                                                      | Control                                                                                                                              | Time to assessment [relative to intervention]       | Biomechanical outcome parameters                                                                                            | Main biomechanical Results                                                                                                                                                                                                                                                                                                                                                                                                                                                                                                                                                                                                                                                                                                                                                                                                                                                                                                                                                                                                                                                                                                                                                                                                      | RoB Rating |
|---------------------|---------------------------------------------------------------------------------------------------------------------------------------------------------|--------------------------------------|-------------------------------------------------------------------|--------------------------------------------------------------------------------------------------------------------------------------|-----------------------------------------------------|-----------------------------------------------------------------------------------------------------------------------------|---------------------------------------------------------------------------------------------------------------------------------------------------------------------------------------------------------------------------------------------------------------------------------------------------------------------------------------------------------------------------------------------------------------------------------------------------------------------------------------------------------------------------------------------------------------------------------------------------------------------------------------------------------------------------------------------------------------------------------------------------------------------------------------------------------------------------------------------------------------------------------------------------------------------------------------------------------------------------------------------------------------------------------------------------------------------------------------------------------------------------------------------------------------------------------------------------------------------------------|------------|
| Young et al. [2019] | Patients with cervical radiculopathy with or without neck pain<br>HVL group [n = 22: mean age 48.8 ± 11.5]<br>Sham group [n = 21: mean age 43.1 ± 10.8] | Thoracic                             | HVL to upper and midthoracic spine [C7-T3 and T4-T9]<br>1 Session | Sham manipulation to upper and midthoracic spine [C7-T3 and T4-T9]<br>[Same position, open hands on patient, no thrust]<br>1 session | Immediately posttreatment 48-72 hours posttreatment | Active cervical ROM [flexion, extension, and rotation, and side-bending to symptomatic and asymptomatic side]<br>Goniometer | <p>Right rotation:<br/>Control vs manipulation:<br/>Immediate: -0.4<br/>24 hrs: -0.3<br/>Control vs mobilisation:<br/>Immediate: -0.6<br/>24 hrs: -0.7<br/>Manipulation vs mobilisation:<br/>Immediate: -0.3<br/>24 hrs: -0.5<br/>No MDC was reported</p> <p>Immediately after treatment, the HVL group had greater cervical flexion [10.8°], extension [10.0°], and rotation to the symptomatic side [14.2°] and asymptomatic side [9.2°] compared to the sham group. 48–72 hours after treatment the HVL group had greater cervical flexion [13.7°], extension [11.1°], rotation to symptomatic side [13.9°] and asymptomatic side [11.4°], side bending to symptomatic side [8.6°]</p> <p>Significant group by time interaction for flexion, extension, rotation to the symptomatic and asymptomatic side, side-bending to symptomatic side [all p &lt; .05] with moderate to large effect sizes. Effect sizes between groups given by Young et al.:</p> <p>Flexion:<br/>Baseline to immediate: 0.7<br/>Baseline to 48–72 hours: 0.8</p> <p>Extension:<br/>Baseline to immediate: 0.8<br/>Baseline to 48.72 hours: 1.0<br/>Side bending symptomatic side<br/>Baseline to immediate: 0.3<br/>Baseline to 48–72 hours: 0.9</p> | Low risk   |

(Continued)

Table 2. (Continued)

| Autor, Year                      | Participants [A]Symptomatic Age Number                                                                                         | Treatment region/ Region of interest | Intervention                                                                                                                                                                      | Control                                                                                                    | Time to assessment [relative to intervention]                                                                                  | Biomechanical outcome parameters                                                          | Main biomechanical Results                                                                                                                                                                                                                                                                          | RoB Rating   |
|----------------------------------|--------------------------------------------------------------------------------------------------------------------------------|--------------------------------------|-----------------------------------------------------------------------------------------------------------------------------------------------------------------------------------|------------------------------------------------------------------------------------------------------------|--------------------------------------------------------------------------------------------------------------------------------|-------------------------------------------------------------------------------------------|-----------------------------------------------------------------------------------------------------------------------------------------------------------------------------------------------------------------------------------------------------------------------------------------------------|--------------|
| González-Iglesias et al. [2009b] | Patients with acute mechanical neck pain <1 month HVLA group [n = 23; mean age 34 ± 4] Control group [n = 22; Mean age 35 ± 6] | Thoracic                             | HVLA to the thoracic spine [maximum 2 thrusts] 1x/week for 3 weeks AND Electrotherapeutic/thermal program [superficial thermotherapy, TENS, 20 minutes] 5 sessions within 3 weeks | Electrotherapeutic/thermal program [superficial thermotherapy, TENS, 20 minutes] 5 sessions within 3 weeks | Visit 5 [i.e., 3 days after the last HVLA, the same day as the last electro/thermal program] 2 weeks and 4 weeks posttreatment | Active cervical ROM [flexion, right/left lateral flexion, right/left rotation] Goniometer | Side bending asymptomatic side: Baseline to immediate: 0.2 Baseline to 48–72 hours: 0.2 Rotation asymptomatic side Baseline to immediate: 1.3 Baseline to 48–72 hours: 1.4 Rotation asymptomatic side: Baseline to immediate: 0.7 Baseline to 48–72 hours: 0.8 MDC was mentioned from other studies | Some concern |

(Continued)

Table 2. (Continued)

| Author, Year               | Participants [A]Symptomatic Age Number                                                                                                                                                          | Treatment region/ Region of interest | Intervention                                                                                                               | Control                                                                                                     | Time to assessment [relative to intervention] | Biomechanical outcome parameters                                                                      | Main biomechanical Results                                                                                                                                                                                                                                                                                                                                                                                                                                                                                                                      | RoB Rating   |
|----------------------------|-------------------------------------------------------------------------------------------------------------------------------------------------------------------------------------------------|--------------------------------------|----------------------------------------------------------------------------------------------------------------------------|-------------------------------------------------------------------------------------------------------------|-----------------------------------------------|-------------------------------------------------------------------------------------------------------|-------------------------------------------------------------------------------------------------------------------------------------------------------------------------------------------------------------------------------------------------------------------------------------------------------------------------------------------------------------------------------------------------------------------------------------------------------------------------------------------------------------------------------------------------|--------------|
| Puntumetakul et al. [2015] | Patients with chronic mechanical neck pain > 3 months<br>Single HVLA [n = 16; mean age 25.9 ± 9.7]<br>Multiple HVLA [n = 16] mean age 26.6 ± 8.2<br>Control group [n = 16; mean age 27.1 ± 7.5] | Thoracic                             | Single HVLA to thoracic spine [T6-T7] OR Multiple HVLA to thoracic spine [T6-T7 and next segmental restrictions] 1 session | Prone lying 2 minutes [with therapist's hands over the level of the thoracic zygapophyseal joint] 1 session | 24 hours posttreatment 1 week posttreatment   | Active cervical ROM [flexion, extension, right/left lateral flexion, right/left rotation] CROM device | Improvement in all cervical ROM in thrust vs non-thrust group<br>Overall group x time interaction was statistically significant [p < 0.05]. No post-hoc tests were reported that would allow assessing whether changes at 2 and 4 weeks were still significant but values that are almost as good as directly after intervention would suggest so.<br>No MCD reported<br>Effect sizes between groups:<br>Flexion: 2.7<br>Extension: 1.9<br>Right rotation: 1.8<br>Left rotation: 2.4<br>Right lateral flexion: 1.9<br>Left lateral flexion: 2.4 | Some concern |

(Continued)

Table 2. (Continued)

| Autor, Year             | Participants<br>[A]Symptomatic<br>Age<br>Number                                                                                                                                           | Treatment<br>region/<br>Region of<br>interest | Intervention                                                                                                 | Control                                                                                                                                                                              | Time to<br>assessment<br>[relative to<br>intervention] | Biomechanical<br>outcome<br>parameters                                                                                  | Main biomechanical Results                                                                                                                                                                                                                                                                                                                                                                                                                                                                                                                                                                                                                                                                                                                                                                                                                                                                                                                                                                                                                                                                                                                                                                                                                                                                                                     | RoB Rating      |
|-------------------------|-------------------------------------------------------------------------------------------------------------------------------------------------------------------------------------------|-----------------------------------------------|--------------------------------------------------------------------------------------------------------------|--------------------------------------------------------------------------------------------------------------------------------------------------------------------------------------|--------------------------------------------------------|-------------------------------------------------------------------------------------------------------------------------|--------------------------------------------------------------------------------------------------------------------------------------------------------------------------------------------------------------------------------------------------------------------------------------------------------------------------------------------------------------------------------------------------------------------------------------------------------------------------------------------------------------------------------------------------------------------------------------------------------------------------------------------------------------------------------------------------------------------------------------------------------------------------------------------------------------------------------------------------------------------------------------------------------------------------------------------------------------------------------------------------------------------------------------------------------------------------------------------------------------------------------------------------------------------------------------------------------------------------------------------------------------------------------------------------------------------------------|-----------------|
| Hanney et al.<br>[2017] | Healthy<br>participants<br>HVLA group<br>[n = 34; mean age<br>23.6 ± 2.8]<br>Stretching group<br>[n = 34; mean age<br>23.8 ± 3.6]<br>Control group<br>[n = 34;<br>Mean age<br>23.4 ± 3.0] | Thoracic                                      | HVLA to cervical<br>thoracic spine [T1,<br>both sides,<br>maximum of 2<br>thrusts each<br>side]<br>1 session | Stretching<br>group: manual<br>upper<br>trapezius<br>stretches<br>[2x30<br>seconds on<br>each side]<br>OR<br>Control<br>group:<br>seated position<br>for 3–5<br>minutes<br>1 session | Immediately<br>posttreatment<br>[within 5<br>minutes]  | Active cervical<br>ROM [flexion,<br>extension,<br>right/left lateral<br>flexion, right/left<br>rotation]<br>CROM device | Pre-intervention/post-intervention<br>HVLA group:<br>Cervical flexion changed by 1.47°, from<br>56.82° to 58.29°; cervical extension<br>changed by -1.94°, from 72.29° to<br>70.35°. Left cervical lateral flexion<br>changed by 1.94°, from 47.12° to<br>49.06°. Right cervical lateral flexion<br>by 0.65°, from 49.82° to 50.47°. Left<br>cervical rotation changed by 0.76°, from<br>70.59° to 71.35°. Right cervical rotation<br>changed by -0.91°, from 71.65° to<br>72.65°.<br>Pre-intervention/post-intervention<br>control group:<br>Cervical flexion changed by -2.24°,<br>from 56.65° to 54.41°. Cervical extension<br>changed by -5.7°, from 69.94°<br>to 64.24°. Left cervical lateral flexion<br>changed by -0.88°, from 48.06° to<br>47.18°. Right cervical lateral flexion by<br>-3.11°, from 51.82° to 48.71°. Left cervical<br>rotation changed by -2.24°, from<br>70.59° to 78.35°. Right cervical rotation<br>changed by -0.88°, from 69.00° to<br>68.12°.<br>Significant time X group effect for<br>extension and cervical lateral flexion left<br>and right.<br>Effect sizes between groups<br>Flexion: -0.4<br>Extension: -0.5<br>Left lateral flexion: -0.2<br>Right lateral flexion: -0.1<br>Left rotation: 0.3<br>Right rotation: 0.4<br>MDC was mentioned, values from other<br>studies considered. | Some<br>concern |

(Continued)

Table 2. (Continued)

| Author, Year          | Participants [A]Symptomatic Age Number                                                                                    | Treatment region/ Region of interest | Intervention                                                                                         | Control                                                                                                                                 | Time to assessment [relative to intervention] | Biomechanical outcome parameters                                       | Main biomechanical Results                                                                                                                                                                                                                                                                                                                                                                                                                           | RoB Rating |
|-----------------------|---------------------------------------------------------------------------------------------------------------------------|--------------------------------------|------------------------------------------------------------------------------------------------------|-----------------------------------------------------------------------------------------------------------------------------------------|-----------------------------------------------|------------------------------------------------------------------------|------------------------------------------------------------------------------------------------------------------------------------------------------------------------------------------------------------------------------------------------------------------------------------------------------------------------------------------------------------------------------------------------------------------------------------------------------|------------|
| Dunning et al. [2012] | Patients with neck pain<br>HvLA group [n = 56; mean age 41.5 ± 11.9]<br>Mobilization group [n = 51; mean age 42.7 ± 13.9] | Cervical and thoracic                | HvLA to upper cervical spine [C1/2, both sides] and upper thoracic spine [T1/2] AND advice 1 session | Mobilization to upper the cervical spine [C1/2, grade IV, 30 seconds on each side] and upper thoracic spine [T1/2] AND advice 1 session | 48 hours posttreatment                        | Passive ROM of C1/2 rotation [flexion rotation test = FRT] CROM device | Within-group change score [baseline to 48 hours follow-up] for HvLA group 8.4° for right FRT, and 5.9° for left FRT. Within-group change score [baseline to 48 hours follow-up] for mobilization group 3.5° for right FRT and 2.4° for left FRT. Between-group differences were statistically significant for right FRT [p < 0.001] and left FRT [p < 0.004]. No MDC was reported for ROM. Effect sizes between groups: FRT right: 0.4 FRT left: 0.7 | Low risk   |

<https://doi.org/10.1371/journal.pone.0328048.t002>

Table 3. Effects of HVLA thrust on facet joint gapping and spinal stiffness.

| Autor, Year          | Participants [A]Symptomatic Age Number                                                                                                                                                                                      | Treatment region/Region of interest | Intervention                                                                                                                                                                     | Control                                                                                                                                         | Time to assessment [relative to intervention] | Biomechanical outcome parameters                             | Main biomechanical Results                                                                                                                                                                                                                                                                                                                                                                                                                                                                                                                                                                                                                             | RoB Rating   |
|----------------------|-----------------------------------------------------------------------------------------------------------------------------------------------------------------------------------------------------------------------------|-------------------------------------|----------------------------------------------------------------------------------------------------------------------------------------------------------------------------------|-------------------------------------------------------------------------------------------------------------------------------------------------|-----------------------------------------------|--------------------------------------------------------------|--------------------------------------------------------------------------------------------------------------------------------------------------------------------------------------------------------------------------------------------------------------------------------------------------------------------------------------------------------------------------------------------------------------------------------------------------------------------------------------------------------------------------------------------------------------------------------------------------------------------------------------------------------|--------------|
| Cramer et al. [2002] | Students without a history of significant lower back pain<br>2 HVLA groups:<br>Group 2 [n = 16]<br>Group 3 [n = 16]<br>2 control groups:<br>Group 1 [n = 16]<br>Group 4 [n = 16]<br>Age: 22–30 yrs<br>Average age: 24.9±1.8 | Lumbar                              | HVLA to the lumbar spine [side-posture on left, L3-S1, multiple thrusts]<br>Group 2: Neutral MRI, HVLA, neutral MRI<br>Group 3: Neutral MRI, HVLA, side-posture MRI<br>1 session | Side-posture positioning [SPP]<br>Group 1: Neutral MRI, SPP, side-posture MRI<br>Group 4: Neutral MRI, very brief SPP, neutral MRI<br>1 session | Post-treatment                                | Gapping difference of L3/L4, L4/L5 and L5/S1 Z-joints in MRI | The difference between group 1 and group 4 is 1.18 mm [p < 0.0001], with the side-posture position group showing a larger gap. The difference between group 3 and group 4 is 1.89 mm [p < 0.0001], with group 3 showing a larger gap. A similar pattern was observed between group 3 and group 1, with a mean difference of 0.71 mm [p = 0.047]. There was no significant difference between group 2 and group 4 [mean difference 0.12 mm, p = 1.00].<br>No effect sizes could be calculated due to lack of detailed reporting of ROM data.<br>MDC was reported [based on a preliminary study but only in relation to sample size calculation]: 0.5 mm | Low risk     |
| Cramer et al. [2012] | Healthy subjects without a history of low back pain<br>HVLA group [n = 30]<br>Control group [n = 10]<br>Age: 18–30 yrs                                                                                                      | Lumbar                              | HVLA to lumbar spine [side-posture on left, L3-S1, 2 thrusts]<br>initial MRI in neutral, second MRI in side-posture<br>1 session                                                 | Side-posture positioning initial MRI in neutral, second MRI in side-posture<br>1 session                                                        | Immediately post-treatment                    | Gapping difference of L3/L4, L4/L5 and L5/S1 Z-joints in MRI | The mean gapping difference for all upside joints was statistically significantly larger than that of downside joints [0.7 mm vs. -0.2 mm]. HVLA upside joints gapped more than SPP upside joints [0.7 vs 0.5 mm, p = 0.03]. HVLA downside joints space decreased less than SPP downside joints [-0.1 vs -0.4 mm, p = 0.01]. No effect sizes could be calculated due to lack of detailed reporting of ROM data. No MDC was reported.                                                                                                                                                                                                                   | Some concern |

(Continued)

Table 3. (Continued)

| Autor, Year                  | Participants [A]Symptomatic Age Number                                                                                                                                                                                                                     | Treatment region/Region of interest | Intervention                                                                                                                                                                                                                                                                                                                                                                  | Control                                                                                                                 | Time to assessment [relative to intervention]                                                                                                                                                        | Biomechanical outcome parameters                                                          | Main biomechanical Results                                                                                                                                                                                                                                                                                                                                                                                                                                                                                                                                                 | RoB Rating   |
|------------------------------|------------------------------------------------------------------------------------------------------------------------------------------------------------------------------------------------------------------------------------------------------------|-------------------------------------|-------------------------------------------------------------------------------------------------------------------------------------------------------------------------------------------------------------------------------------------------------------------------------------------------------------------------------------------------------------------------------|-------------------------------------------------------------------------------------------------------------------------|------------------------------------------------------------------------------------------------------------------------------------------------------------------------------------------------------|-------------------------------------------------------------------------------------------|----------------------------------------------------------------------------------------------------------------------------------------------------------------------------------------------------------------------------------------------------------------------------------------------------------------------------------------------------------------------------------------------------------------------------------------------------------------------------------------------------------------------------------------------------------------------------|--------------|
| Cramer et al. [2013]         | Patients with acute low back pain < 6 weeks<br>2 HVLA groups:<br>Group 2 [n = 28: mean age 42.7 ± 10.3]<br>Group 3 [n = 28: mean age 43.7 ± 12.7]<br>2 control groups:<br>Group 1 [n = 28: mean age 44.2 ± 12.7]<br>Group 4 [n = 28: mean age 47.6 ± 10.0] | Lumbar                              | HVLA to the lumbar spine [side-posture, most painful side up, L3-S1, multiple thrusts]<br>Group 2: Neutral MRI, HVLA, neutral MRI<br>Group 3: Neutral MRI, HVLA, side-posture MRI                                                                                                                                                                                             | Side-posture positioning [SPP]<br>Group 1: Neutral MRI, SPP, side-posture MRI<br>Group 4: Neutral MRI, SPP, neutral MRI | MRI 1: scan before any treatment began and right after the treatment<br>MRI 2: scan before treatment and right after<br>In between both MRI sessions were two weeks with treatment at a chiropractor | Greatest gap-ping difference of L4/L5 or L5/S1 Z-joint in MRI before and after SMT or SPP | First Appointment:<br>Group 1 had a greater gap-ping pre-post than the three other groups [Mean differences: Group 1 = 1.09 mm, Group 2 = 0.24 mm, Group 3 = 0.19 mm, Group 4 = 0.71 mm, p = 0.001].<br>Second Appointment:<br>Group 3 had greater gap-ping pre-post than the other three groups [Mean differences: Group 1 = 0.65 mm, Group 2 = 0.18 mm, Group 3 = 0.76 mm, Group 4 = 0.44 mm, p = 0.005]<br>Use of a crossover design for the MRI 2 protocol.<br>No effect sizes could be calculated due to lack of detailed reporting of ROM data. No MDC was reported. | Low risk     |
| Pagé and Des-carreaux [2019] | Chronic thoracic pain ≥ 3 months in T6-8 region<br>3 HVLA groups:<br>Group 1 [n = 20: mean age 41.5 ± 13.8]<br>Group 2 [n = 22: mean age 37.5 ± 13.5]<br>Group 3 [n = 21: 37.2 ± 11.1]<br>Control group [n = 18: 35.8 ± 13.7]                              | Thoracic spine                      | HVLA to thoracic spine [single thrust at T7, applied with apparatus]<br>Group 1<br>135N peak force<br>125ms impulse<br>duration<br>920N/s rate of application<br>Group 2<br>250N peak force<br>250ms impulse<br>duration<br>1840N/s rate of application<br>Group 3<br>250N peak force<br>250ms impulse<br>duration<br>920N/s rate of application<br>3 sessions over 2–3 weeks | Control group:<br>Rested quietly for 5 minutes<br>3 sessions over 2–3 weeks                                             | Posttreatment at each treatment session 6–8 days after last treatment<br>were two weeks with treatment at a chiropractor                                                                             | Spinal stiffness                                                                          | The global stiffness showed a mean decrease of -0.01 N/mm at T6, -0.25 N/mm at T7, and -0.32 N/mm at T8. Changes were -0.04 N/mm, -0.25 N/mm, and -0.33 N/mm for terminal stiffness. No statistically significant difference in any of the secondary outcomes between the four groups [all p values < 0.005]. Spinal stiffness at T7 and T8 was reduced in all groups [including the control group]. No effect sizes could be calculated due to lack of detailed reporting of stiffness data.<br>Strength: Between-group comparison using a randomized sequence            | Some concern |

<https://doi.org/10.1371/journal.pone.0328048.t003>

intervention in a sample of 22 participants. The other study (2.9%) [N=52] investigated active thoracic excursion (i.e., full flexion to full extension) in patients with subacromial impingement syndrome of the shoulder and found no difference between a total of 6 HVLA thrusts applied to the upper, middle, and lower thoracic spine in a single session compared to a sham intervention [38] (Table 1).

**Effects of lumbar HVLA thrusts on lumbar ROM.** Two studies (5.8%) rated some concerns of bias, investigated lumbar spine HVLA thrusts effects on lumbar ROM [63,67]. One study (2.9%) included 330 participants with chronic non-specific LBP at level L4/5, in three treatment arms, and measured the effects on active ROM using the modified Schober test. The patients underwent twelve treatment sessions (3x/week for four weeks) including lumbar spine HVLA thrusts plus laser plus exercises, or laser and exercises without HVLA thrust, or exercises only. The modified Schober test showed an improvement for the HVLA thrust group compared to the two other groups [63]. Another study (2.9%) with 14 participants with lumbar spinal stenosis investigated the effects of bilateral lumbar HVLA thrusts on active ROM [flexion, extension, left lateral flexion, right lateral flexion, left rotation and right rotation]. No within or between group differences pre- and post-treatment were reported [67] (Table 1).

### Regional effects of HVLA thrusts on ROM

**Effects of thoracic HVLA thrusts on cervical ROM.** Eight studies investigating the effects of thoracic spine HVLA thrusts on cervical ROM showed an increase in cervical ROM [28,30,37,40,61,62,68,69]. Four (50%) were rated as low risk of bias [28,30,37,40] and four (50%) as having some concerns for risk of bias [61,62,68,69]. Five (62.5%) included acute or chronic neck pain patients [28,30,37,68,69], two (25%) included cervical radiculopathy patients with or without neck pain [40,61], and one (12.5%) included healthy participants [62]. One (12.5%) study only measured cervical rotation and consequently only reported an increase of rotation [28]. The other studies (87.5%) measured all planes of cervical ROM, with two (25%) reporting increased ROM in all planes [30,68] and five (62.5%) in different cervical planes [37,40,61,62,69]. Six studies (75%) measured immediately post-treatment [28,37,40,61,62,68], and two studies (25%) reported an increase of cervical ROM lasting up to one [30,69] or two weeks [68]. Treatment approaches ranged from one session with one to two HVLA thrusts on one site [28,37,61,62,69] or multiple sites [40,69] to multiple sessions of HVLA thrusts [68] (Table 2).

**Effects of thoracic and cervical HVLA thrusts on cervical ROM.** One study with low risk of bias compared HVLA thrusts with mobilization of the upper cervical and the upper thoracic region on the passive range of cervical rotation of C1/2 in a neck pain population and reported a significantly greater increase in both rotation directions for the HVLA thrust compared to the mobilization group 48 hours after the intervention [31] (Table 2).

### Effects of HVLA thrusts on facet joint gapping

Three studies compared the effects of lumbar side-posture HVLA thrusts with pure side-posture positioning on gapping of the lumbar facet joints as measured by MRI before and after application of the HVLA thrusts [26,27,53]. Two studies (66%) were rated as low risk of bias and one (33%) as having some concerns for risk of bias. Two larger follow-up studies, also in healthy participants, showed statistically significant differences in gapping between the subjects receiving side-posture HVLA thrusts and those receiving side-posture positioning only, but only when the MRI following HVLA thrusts was conducted in side-posture. In patients with acute LBP (N=112) [26], at onset, pure side-positioning resulted in more gapping than HVLA thrusts [delivered with the most painful side positioned up] followed by side-positioning. In contrast, after two weeks of chiropractic treatment, facet joint gapping after HVLA thrusts was greater than after side-positioning (Table 3).

### Effects of HVLA thrust on spinal stiffness

One study rated some concerns for risk of bias and investigated spinal stiffness after the application of IAM HVLA thrusts to T7 in chronic thoracic pain patients [54]. This four-arm trial (N=81) included three HVLA thrust groups using different

dosages of applied force magnitude, impulse duration, and rate of force application, and a control group. The treatment regime was three sessions over two to three weeks. Spinal stiffness was measured before and after HVLA thrusts over the spinous processes of T6, T7, and T8. Displacement of vertebrae was measured using an indenter device during exhalation using the following procedure: after application of a posterior-to-anterior load of 5N on the spinous process, the load was gradually increased with an 18 N/s rate of force application to 45 N. Terminal and global spinal stiffness coefficients were calculated using the force and displacement data recorded during each spinal stiffness trial. Terminal stiffness was defined as the ratio of the load divided by the displacement between 10 and 45 N, and global stiffness was defined as the slope of the straight-line best fitting the data over the same load interval. Stiffness was reduced after the intervention in all groups, including the control group, but no statistically significant difference was found between the groups ([Table 3](#)).

### Relationship between biomechanical and patient-rated outcomes

Sixteen (47%) of the included studies used patient-rated outcome measures such as pain [visual analogue pain scale, numeric pain rating scale, 9-point faces pain scale] [[28,30,34,37,41,57,59,60,64–66,68,69](#)] and/or disability [neck pain and disability scale, neck disability index, Northwick Park neck pain questionnaire, jaw functioning limitation scale] [[30,32,40,41,56,64,66,69](#)] as primary outcome measures. One study, rated some concerns for risk of bias, statistically linked these patient-rated outcomes to biomechanical measures. This study reported an association between neck pain at rest and the improvement in ROM, i.e., the greater the increase in ROM, the greater the improvement in neck pain.

### Discussion

This systematic review found evidence in support for local effects of HVLA thrusts to the cervical spine on cervical ROM and for regional effects of thoracic HVLA thrusts on cervical ROM. This indicates that cervical ROM can be increased by HVLA thrusts to either the cervical or the thoracic spine. In contrast, evidence regarding local effects of HVLA thrusts to the thoracic and lumbar spine remains inconclusive. Similarly, it is not yet clear whether HVLA thrusts lead to facet joint gapping or reduce spinal stiffness. Most studies investigated pain and/or disability as patient-reported outcomes, but only one analyzed their relationship to the biomechanical measures.

### Local effects of HVLA thrusts on ROM

The finding of HVLA thrusts increasing cervical spinal ROM is in line with previous systematic reviews [[19,20](#)]. Although the heterogeneity of the studies regarding treatment approaches and participant characteristics hinders comparison, there appears to be an immediate effect of HVLA thrust to the cervical spine on increased cervical ROM. This also holds true when only considering studies delivering HVLA thrust-SMT to the upper cervical spine: the study that did not show an effect included patients with temporomandibular joint dysfunction [[66](#)], while the positive studies included patients with tension-type headache [[32](#)], cervicogenic headache [[36](#)] or chronic neck pain [[58](#)]. Patients with temporomandibular joint dysfunction might not necessarily have upper cervical joint dysfunctions and adding HVLA-SMT to the comparison treatment of suboccipital release and exercise might not change the biomechanical results. Overall, as studies differed with relation to measuring active or passive ROM and with relation to which planes were measured, no clear pattern emerged of which movement planes of cervical ROM are affected most or most often by HVLA thrust-SMT directed to the cervical spine.

As for the two studies [[29,38](#)] on the immediate, local effects of a single thoracic HVLA thrusts applied to the thoracic spine compared to a sham intervention. Ditchfield and colleagues applied a single thrust to T9 in patients with subacromial pain and showed an increase of thoracic flexion as measured by inclinometer [assessor-blinded] [[29](#)]. Kardouni and colleagues applied a total of six thoracic thrusts to young healthy adults and did not report any effect on thoracic spine extension and thoracic excursion using an electromagnetic motion capture system [[38](#)]. Thus, given the fact that only electromagnetic studies were available for the local effects of HVLA thrusts on the thoracic spine, the local effect of thoracic spine HVLA on thoracic ROM remains unclear and underlines the notion that research on the thoracic spine is scarce [[70](#)].

Two studies examining the local effects of HVLA thrusts on the lumbar spine showed divergent findings [63,67]. The larger study's HVLA group demonstrated a significant reduction in pain and an improvement in function [63]. The smaller study did not find any effect of a single HVLA thrusts in patients with spinal canal stenosis [67]. In addition to being underpowered, as suggested by the authors, it is conceivable that it is more difficult in patients with spinal canal stenosis to increase ROM. Thus, several factors might be contributing to the divergent findings, including variations in the number of interventions administered (three sessions over four weeks vs. one single session with one single thrust), as well as differences in the sample size ( $n=330$  vs.  $n=14$ ) and type of the study populations (patients with uncomplicated chronic low back pain, lumbago, sciatica, with pain localized in L4/L5 vs. degenerative lumbar stenosis).

### Regional effects of HVLA thrusts on ROM

Eight studies investigating the effects of thoracic spine HVLA thrusts on cervical range of motion reported an improvement of cervical ROM, which is in line with findings of a previous systematic review [21]. A possible explanation for this finding might be that functional disturbances in the upper thoracic spine can lead to decreased muscle strength [71] and impaired ROM in the cervical spine. Thus, treating such functional disturbances in the upper thoracic spine by manual therapy to restore normal biomechanical function might normalize cervical ROM [71–74]. In addition, other phenomena might be contributing to the improvement of cervical ROM in response to thoracic HVLA thrusts, including those directed at the mid-thoracic spine. In particular, DNIC (diffuse noxious inhibitory controls)-like phenomena or non-specific treatment effects might be involved.

### Effects on facet joint gapping and spinal stiffness

Inactivity, asymmetrical loads, and injury can lead to aberrant facet joint motion, hypomobility, and adhesion formation [14,23]. Thus, gapping the facet joints and breaking up adhesions might be one of the mechanisms of action of HVLA thrusts [14]. The three studies, all conducted by the same research group, investigated the effects of lumbar HVLA thrusts on gapping of the facet joints in an asymptomatic [27,53] and symptomatic LBP study population [26] provided some evidence that HVLA thrusts immediately gaps the lumbar facet joints, but only if followed by side-posture positioning, which suggests a short-lived effect.

A decrease in spinal stiffness has been shown in small studies after HVLA thrusts and has been related to changes in ROM, pain, pressure pain threshold, and spinal tissue behavior, e.g., by relaxation of the spinal connective tissues and/or changed motor reflexes [75]. However, the single study on spinal stiffness included in this review did not confirm these findings [54]. It has to be considered that posterior to anterior stiffness measurements are influenced by multiple factors — including soft tissue compliance and joint morphology — and do not provide a direct quantification of intrinsic segmental stiffness. [76–78].

### Clinical considerations and recommendations for future studies

Interestingly, only one [58] of the included studies on ROM of any spinal region reported whether ROM was altered in the respective study population compared to norm values at baseline. This is a major shortcoming and hampers the interpretation of studies investigating the effect of a manual treatment that aims at improving ROM. Nevertheless, four articles refer to the minimal detectable change [MDC]: three studies report changes in ROM higher than the MDC [28,58,64] and one study changes lower than the MDC [40]. Future studies would benefit from quantifying a possible restriction of ROM beforehand and testing whether HVLA thrusts normalized ROM, considering the MDC or an alternative method to account for repeated measures effects. Furthermore, only one study investigated a possible relationship between biomechanical and patient-related outcomes such as pain or disability. For future studies, the incorporation of those links is strongly recommended and as long as such a link is not established, an increase in ROM alone should only be interpreted as a proxy for a successful outcome, when (painless) restricted ROM is one of the patients' main complaints.

## Limitations

In general, the RoB tool presents challenges because it focuses only on specific domains and does not assess the overall quality of the study [79]. The RoB tool, used as a checklist, aids in quality rating through its built-in algorithm while also allowing assessors to adjust the rating. However, it is a complex tool [80], that should only be used after intensive training [80], as was done in the present study. Nevertheless, the group of raters was heterogeneous in terms of expertise in conducting systematic reviews, and not all raters were involved in all review stages during the updates. Additionally, the literature search was limited to the English language which may have excluded some relevant studies. Lastly, due to the high heterogeneity of data with regard to participant characteristics, intervention frequency, and outcomes, no meta-analysis could be performed.

## Conclusions

The main finding of this review, based on equal numbers of studies rated low-risk and some concerns, is that HVLA thrusts, applied to the cervical or the thoracic spine, increases cervical ROM, which is likely of clinical significance. However, the results on the local effects of an HVLA thrusts to the thoracic and lumbar spine, as well as on the effects of an HVLA thrusts on facet joint gapping and spinal stiffness, remain inconclusive. Future studies should quantify the outcome measures at baseline and assess potential relationships between the biomechanical effects of an HVLA thrust and clinical outcomes.

## Supporting information

### S1 File. Characteristics of excluded studies.

(DOCX)

### S2 File. Search strategy.

(PDF)

### S3 File. PRISMA checklist.

(DOCX)

## Acknowledgments

We thank the information specialist Martina Gosteli from the University Library of the University of Zurich, Zurich, Switzerland for conducting the literature search and Dr. Kayleigh Aymon from the Department of Chiropractic Medicine, Balgrist University Hospital and University of Zurich, Zurich, Switzerland for proofreading the manuscript.

## Author contributions

**Conceptualization:** Anke Langenfeld, Mirjam Baechler, Daniel Streuli, Brigitte Wirth, Petra Schweinhardt.

**Data curation:** Jaap Swanenburg, Malin Mühlemann, Luana Nyirö, Daniel Streuli, Petra Schweinhardt.

**Methodology:** Anke Langenfeld, Mirjam Baechler, Jaap Swanenburg, Brigitte Wirth, Petra Schweinhardt.

**Project administration:** Anke Langenfeld, Mirjam Baechler, Brigitte Wirth, Petra Schweinhardt.

**Supervision:** Anke Langenfeld, Brigitte Wirth, Petra Schweinhardt.

**Validation:** Anke Langenfeld.

**Visualization:** Anke Langenfeld.

**Writing – original draft:** Anke Langenfeld, Mirjam Baechler, Brigitte Wirth, Petra Schweinhardt.

**Writing – review & editing:** Anke Langenfeld, Mirjam Baechler, Jaap Swanenburg, Malin Mühlemann, Luana Nyirö, Daniel Streuli, Brigitte Wirth, Petra Schweinhardt.

## References

1. Triano JJ, Descarreaux M, Dugas C. Biomechanics—review of approaches for performance training in spinal manipulation. *J Electromyogr Kinesiol.* 2012;22(5):732–9. <https://doi.org/10.1016/j.jelekin.2012.03.011> PMID: [22542770](https://pubmed.ncbi.nlm.nih.gov/22542770/)
2. Wong JJ, Côté P, Sutton DA, Randhawa K, Yu H, Varatharajan S, et al. Clinical practice guidelines for the noninvasive management of low back pain: a systematic review by the Ontario Protocol for Traffic Injury Management (OPTIMa) Collaboration. *Eur J Pain.* 2017;21(2):201–16. <https://doi.org/10.1002/ejp.931> PMID: [27712027](https://pubmed.ncbi.nlm.nih.gov/27712027/)
3. Bussi eres AE, Stewart G, Al-Zoubi F, Decina P, Descarreaux M, Hayden J, et al. The treatment of neck pain-associated disorders and Whiplash-Associated Disorders: a clinical practice guideline. *J Manipulative Physiol Ther.* 2016;39(8):523–564.e27. <https://doi.org/10.1016/j.jmpt.2016.08.007> PMID: [27836071](https://pubmed.ncbi.nlm.nih.gov/27836071/)
4. Kjaer P, Kongsted A, Hartvigsen J, Isenberg-J rgensen A, Schi tztz-Christensen B, S borg B, et al. National clinical guidelines for non-surgical treatment of patients with recent onset neck pain or cervical radiculopathy. *Eur Spine J.* 2017;26(9):2242–57. <https://doi.org/10.1007/s00586-017-5121-8> PMID: [28523381](https://pubmed.ncbi.nlm.nih.gov/28523381/)
5. Stochkendahl MJ, Kjaer P, Hartvigsen J, Kongsted A, Aaboe J, Andersen M, et al. National Clinical Guidelines for non-surgical treatment of patients with recent onset low back pain or lumbar radiculopathy. *Eur Spine J.* 2018;27(1):60–75. <https://doi.org/10.1007/s00586-017-5099-2> PMID: [28429142](https://pubmed.ncbi.nlm.nih.gov/28429142/)
6. Paige NM, Miake-Lye IM, Booth MS, Beroes JM, Mardian AS, Dougherty P, et al. Association of spinal manipulative therapy with clinical benefit and harm for acute low back pain: systematic review and meta-analysis. *JAMA.* 2017;317(14):1451–60. <https://doi.org/10.1001/jama.2017.3086> PMID: [28399251](https://pubmed.ncbi.nlm.nih.gov/28399251/)
7. Rubinstein SM, de Zoete A, van Middelkoop M, Assendelft WJJ, de Boer MR, van Tulder MW. Benefits and harms of spinal manipulative therapy for the treatment of chronic low back pain: systematic review and meta-analysis of randomised controlled trials. *BMJ.* 2019;364:l689. <https://doi.org/10.1136/bmj.l689> PMID: [30867144](https://pubmed.ncbi.nlm.nih.gov/30867144/)
8. Bronfort G, Evans R, Anderson AV, Svendsen KH, Bracha Y, Grimm RH. Spinal manipulation, medication, or home exercise with advice for acute and subacute neck pain. *Ann Intern Med.* 2001;156(1):1–10.
9. Herzog W. The biomechanics of spinal manipulation. *J Bodyw Mov Ther.* 2010;14(3):280–6. <https://doi.org/10.1016/j.jbmt.2010.03.004> PMID: [20538226](https://pubmed.ncbi.nlm.nih.gov/20538226/)
10. Descarreaux M, Nougouarou F, Dugas C. Standardization of spinal manipulation therapy in humans: development of a novel device designed to measure dose-response. *J Manipulative Physiol Ther.* 2013;36(2):78–83. <https://doi.org/10.1016/j.jmpt.2012.12.007> PMID: [23499142](https://pubmed.ncbi.nlm.nih.gov/23499142/)
11. Bergamino M, Vongher A, Mourad F, Dunning J, Rossetini G, Palladino M, et al. Patient concerns and beliefs related to audible popping sound and the effectiveness of manipulation: findings from an online survey. *J Manipulative Physiol Ther.* 2022;45(2):144–52. <https://doi.org/10.1016/j.jmpt.2022.03.021> PMID: [35753885](https://pubmed.ncbi.nlm.nih.gov/35753885/)
12. Mikhail J, Funabashi M, Descarreaux M, Pag  I. Assessing forces during spinal manipulation and mobilization: factors influencing the difference between forces at the patient-table and clinician-patient interfaces. *Chiropr Man Therap.* 2020;28(1):57. <https://doi.org/10.1186/s12998-020-00346-1> PMID: [33168008](https://pubmed.ncbi.nlm.nih.gov/33168008/)
13. Mourad F, Yousif MS, Maselli F, Pellicciari L, Meroni R, Dunning J, et al. Knowledge, beliefs, and attitudes of spinal manipulation: a cross-sectional survey of Italian physiotherapists. *Chiropr Man Therap.* 2022;30(1):38. <https://doi.org/10.1186/s12998-022-00449-x> PMID: [36096835](https://pubmed.ncbi.nlm.nih.gov/36096835/)
14. Evans DW. Mechanisms and effects of spinal high-velocity, low-amplitude thrust manipulation: previous theories. *J Manipulative Physiol Ther.* 2002;25(4):251–62. <https://doi.org/10.1067/mmt.2002.123166> PMID: [12021744](https://pubmed.ncbi.nlm.nih.gov/12021744/)
15. Triano JJ. Biomechanics of spinal manipulation. *The Spine J.* 2001;1(2):121–30.
16. Colloca CJ, Keller TS, Black P, Normand MC, Harrison DE, Harrison DD. Comparison of mechanical force of manually assisted chiropractic adjusting instruments. *J Manipulative Physiol Ther.* 2005;28(6):414–22. <https://doi.org/10.1016/j.jmpt.2005.06.004> PMID: [16096041](https://pubmed.ncbi.nlm.nih.gov/16096041/)
17. Bialosky JE, Beneciuk JM, Bishop MD, Coronado RA, Penza CW, Simon CB, et al. Unraveling the mechanisms of manual therapy: modeling an approach. *J Orthop Sports Phys Ther.* 2018;48(1):8–18.
18. De Carvalho DE, Callaghan JP. The effect of lumbar spinal manipulation on biomechanical factors and perceived transient pain during prolonged sitting: a laboratory-controlled cross-sectional study. *Chiropr Man Therap.* 2022;30(1):62. <https://doi.org/10.1186/s12998-022-00472-y> PMID: [36585725](https://pubmed.ncbi.nlm.nih.gov/36585725/)
19. Millan M, Leboeuf-Yde C, Budgell B, Descarreaux M, Amorim M-A. The effect of spinal manipulative therapy on spinal range of motion: a systematic literature review. *Chiropr Man Therap.* 2012;20(1):23. <https://doi.org/10.1186/2045-709X-20-23> PMID: [22866816](https://pubmed.ncbi.nlm.nih.gov/22866816/)
20. Galindez-Ibarbengoetxea X, Setuain I, Andersen LL, Ram rez-Velez R, Gonz lez-Izal M, Jauregi A, et al. Effects of cervical high-velocity low-amplitude techniques on range of motion, strength performance, and cardiovascular outcomes: a review. *J Altern Complement Med.* 2017;23(9):667–75. <https://doi.org/10.1089/acm.2017.0002> PMID: [28731832](https://pubmed.ncbi.nlm.nih.gov/28731832/)

21. Cross KM, Kuenze C, Grindstaff TL, Hertel J. Thoracic spine thrust manipulation improves pain, range of motion, and self-reported function in patients with mechanical neck pain: a systematic review. *J Orthop Sports Phys Ther.* 2011;41(9):633–42. <https://doi.org/10.2519/jospt.2011.3670> PMID: [21885904](https://pubmed.ncbi.nlm.nih.gov/21885904/)
22. Page MJ, McKenzie JE, Bossuyt PM, Boutron I, Hoffmann TC, Mulrow CD, et al. The PRISMA 2020 statement: an updated guideline for reporting systematic reviews. *BMJ.* 2021;372:n71. <https://doi.org/10.1136/bmj.n71> PMID: [33782057](https://pubmed.ncbi.nlm.nih.gov/33782057/)
23. Cramer G, Budgell B, Henderson C, Khalsa P, Pickar J. Basic science research related to chiropractic spinal adjusting: the state of the art and recommendations revisited. *J Manipulative Physiol Ther.* 2006;29(9):726–61. <https://doi.org/10.1016/j.jmpt.2006.09.003> PMID: [17142166](https://pubmed.ncbi.nlm.nih.gov/17142166/)
24. Edmondston SJ, Allison GT, Althorpe BM, McConnell DR, Samuel KK. Comparison of ribcage and posteroanterior thoracic spine stiffness: an investigation of the normal response. *Man Ther.* 1999;4(3):157–62. <https://doi.org/10.1054/math.1999.0202> PMID: [10513446](https://pubmed.ncbi.nlm.nih.gov/10513446/)
25. Sterne JAC, Savović J, Page MJ, Elbers RG, Blencowe NS, Boutron I, et al. RoB 2: a revised tool for assessing risk of bias in randomised trials. *BMJ.* 2019;366:l4898. <https://doi.org/10.1136/bmj.l4898> PMID: [31462531](https://pubmed.ncbi.nlm.nih.gov/31462531/)
26. Cramer GD, Cambron J, Cantu JA, Dexheimer JM, Pocius JD, Gregerson D, et al. Magnetic resonance imaging zygapophyseal joint space changes (gapping) in low back pain patients following spinal manipulation and side-posture positioning: a randomized controlled mechanisms trial with blinding. *J Manipulative Physiol Ther.* 2013;36(4):203–17. <https://doi.org/10.1016/j.jmpt.2013.04.003> PMID: [23648055](https://pubmed.ncbi.nlm.nih.gov/23648055/)
27. Cramer GD, Gregerson DM, Knudsen JT, Hubbard BB, Ustas LM, Cantu JA. The effects of side-posture positioning and spinal adjusting on the lumbar Z joints: a randomized controlled trial with sixty-four subjects. *Spine.* 2002;27(22):2459–66. <https://doi.org/10.1097/01.BRS.0000031267.86149.E3> PMID: [12435975](https://pubmed.ncbi.nlm.nih.gov/12435975/)
28. Krauss J, Creighton D, Ely JD, Podlowska-Ely J. The immediate effects of upper thoracic translatoric spinal manipulation on cervical pain and range of motion: a randomized clinical trial. *J Man Manip Ther.* 2008;16(2):93–9. <https://doi.org/10.1179/106698108790818530> PMID: [19119394](https://pubmed.ncbi.nlm.nih.gov/19119394/)
29. Ditchfield S, You E, Delafontaine A, Hamaoui A. Short-term effects of thoracic spine manipulation on the biomechanical organisation of gait initiation: a randomized pilot study. *Front Hum Neurosci.* 2017;11:343. <https://doi.org/10.3389/fnhum.2017.00343> PMID: [28713254](https://pubmed.ncbi.nlm.nih.gov/28713254/)
30. González-Iglesias J, Fernández-de-las-Peñas C, Cleland JA, Albuquerque-Sendín F, Palomeque-del-Cerro L, Méndez-Sánchez R. Inclusion of thoracic spine thrust manipulation into an electro-therapy/thermal program for the management of patients with acute mechanical neck pain: a randomized clinical trial. *Man Ther.* 2009;14(3):306–13. <https://doi.org/10.1016/j.math.2008.04.006> PMID: [18692428](https://pubmed.ncbi.nlm.nih.gov/18692428/)
31. Dunning JR, Cleland JA, Waldrop MA, Arnot CF, Young IA, Turner M, et al. Upper cervical and upper thoracic thrust manipulation versus nonthrust mobilization in patients with mechanical neck pain: a multicenter randomized clinical trial. *J Orthop Sports Phys Ther.* 2012;42(1):5–18. <https://doi.org/10.2519/jospt.2012.3894> PMID: [21979312](https://pubmed.ncbi.nlm.nih.gov/21979312/)
32. Espí-López GV, Zurriaga-Llorens R, Monzani L, Falla D. The effect of manipulation plus massage therapy versus massage therapy alone in people with tension-type headache. A randomized controlled clinical trial. *Eur J Phys Rehabil Med.* 2016;52(5):606–17. PMID: [26989818](https://pubmed.ncbi.nlm.nih.gov/26989818/)
33. Galindez-Ibarbengoetxea X, Setuain I, González-Izal M, Jauregi A, Ramírez-Velez R, Andersen LL, et al. Randomised controlled pilot trial of high-velocity, low-amplitude manipulation on cervical and upper thoracic spine levels in asymptomatic subjects. *Int J Osteopath Med.* 2017;25:6–14. <https://doi.org/10.1016/j.ijosm.2016.11.004>
34. Lopez-Lopez A, Alonso Perez JL, González Gutierrez JL, La Touche R, Lerma Lara S, Izquierdo H, et al. Mobilization versus manipulations versus sustain apophyseal natural glide techniques and interaction with psychological factors for patients with chronic neck pain: randomized controlled trial. *Eur J Phys Rehabil Med.* 2015;51(2):121–32. PMID: [25296741](https://pubmed.ncbi.nlm.nih.gov/25296741/)
35. Vernon HT, Triano JJ, Ross JK, Tran SK, Soave DM, Dinulos MD. Validation of a novel sham cervical manipulation procedure. *Spine J.* 2012;12(11):1021–8. <https://doi.org/10.1016/j.spinee.2012.10.009> PMID: [23158966](https://pubmed.ncbi.nlm.nih.gov/23158966/)
36. Whittingham W, Nilsson N. Active range of motion in the cervical spine increases after spinal manipulation (toggle recoil). *J Manipulative Physiol Ther.* 2001;24(9):552–5. <https://doi.org/10.1067/j.mmt.2001.118979> PMID: [11753327](https://pubmed.ncbi.nlm.nih.gov/11753327/)
37. Suvarnato T, Puntumetakul R, Kaber D, Boucaut R, Boonphakob Y, Arayawichanon P, et al. The effects of thoracic manipulation versus mobilization for chronic neck pain: a randomized controlled trial pilot study. *J Phys Ther Sci.* 2013;25(7):865–71. <https://doi.org/10.1589/jpts.25.865> PMID: [24259872](https://pubmed.ncbi.nlm.nih.gov/24259872/)
38. Kardouni JR, Pidcoe PE, Shaffer SW, Finucane SD, Cheatham SA, Sousa CO, et al. Thoracic spine manipulation in individuals with subacromial impingement syndrome does not immediately alter thoracic spine kinematics, thoracic excursion, or scapular kinematics: a randomized controlled trial. *J Orthop Sports Phys Ther.* 2015;45(7):527–38. <https://doi.org/10.2519/jospt.2015.5647> PMID: [25996365](https://pubmed.ncbi.nlm.nih.gov/25996365/)
39. Valera-Calero A, Lluch Girbés E, Gallego-Izquierdo T, Malfliet A, Pecos-Martín D. Endocrine response after cervical manipulation and mobilization in people with chronic mechanical neck pain: a randomized controlled trial. *Eur J Phys Rehabil Med.* 2019;55(6):792–805. <https://doi.org/10.23736/S1973-9087.19.05475-3> PMID: [30621368](https://pubmed.ncbi.nlm.nih.gov/30621368/)
40. Young IA, Pozzi F, Dunning J, Linkonis R, Michener LA. Immediate and short-term effects of thoracic spine manipulation in patients with cervical radiculopathy: a randomized controlled trial. *J Orthop Sports Phys Ther.* 2019;49(5):299–309. <https://doi.org/10.2519/jospt.2019.8150> PMID: [31021691](https://pubmed.ncbi.nlm.nih.gov/31021691/)
41. Brück K, Jacobi K, Schmidt T. Fascial treatment versus manual therapy (HVLA) in patients with chronic neck pain: a randomized controlled trial. *J Back Musculoskelet Rehabil.* 2021;34(6):997–1006. <https://doi.org/10.3233/BMR-191731> PMID: [34092587](https://pubmed.ncbi.nlm.nih.gov/34092587/)
42. Martel J, Dugas C, Dubois J-D, Descarreaux M. A randomised controlled trial of preventive spinal manipulation with and without a home exercise program for patients with chronic neck pain. *BMC Musculoskelet Disord.* 2011;12:41. <https://doi.org/10.1186/1471-2474-12-41> PMID: [21303529](https://pubmed.ncbi.nlm.nih.gov/21303529/)

43. Haussler KK, Martin CE, Hill AE. Efficacy of spinal manipulation and mobilisation on trunk flexibility and stiffness in horses: a randomised clinical trial. *Equine Vet J Suppl.* 2010;(38):695–702. <https://doi.org/10.1111/j.2042-3306.2010.00241.x> PMID: [21059083](#)
44. Lau HMC, Wing Chiu TT, Lam T-H. The effectiveness of thoracic manipulation on patients with chronic mechanical neck pain - a randomized controlled trial. *Man Ther.* 2011;16(2):141–7. <https://doi.org/10.1016/j.math.2010.08.003> PMID: [20813577](#)
45. Pikula J. The effect of spinal manipulative therapy (SMT) on pain reduction and range of motion in patients with acute unilateral neck pain: a pilot study. *J Can Chiroprac Assoc.* 1999;43(2):111–9.
46. Saayman L, Hay C, Abrahamse H. Chiropractic manipulative therapy and low-level laser therapy in the management of cervical facet dysfunction: a randomized controlled study. *J Manipulative Physiol Ther.* 2011;34(3):153–63. <https://doi.org/10.1016/j.jmpt.2011.02.010> PMID: [21492750](#)
47. Vavrek D, Haas M, Peterson D. Physical examination and self-reported pain outcomes from a randomized trial on chronic cervicogenic headache. *J Manipulative Physiol Ther.* 2010;33(5):338–48. <https://doi.org/10.1016/j.jmpt.2010.05.004> PMID: [20605552](#)
48. Gavin D. The effect of joint manipulation techniques on active range of motion in the mid-thoracic spine of asymptomatic subjects. *J Man Manip Ther.* 1999;7(3):114–22. <https://doi.org/10.1179/106698199790811672>
49. Lin JH, Shen T, Chung RCK, Chiu TTW. The effectiveness of Long's manipulation on patients with chronic mechanical neck pain: a randomized controlled trial. *Man Ther.* 2013;18(4):308–15. <https://doi.org/10.1016/j.math.2012.11.005> PMID: [23352180](#)
50. Griffiths FS, McSweeney T, Edwards DJ. Immediate effects and associations between interoceptive accuracy and range of motion after a HVLA thrust on the thoracolumbar junction: a randomised controlled trial. *J Bodyw Mov Ther.* 2019;23(4):818–24. <https://doi.org/10.1016/j.jbmt.2019.06.007> PMID: [31733767](#)
51. Nim CG, Kawchuk GN, Schiøttz-Christensen B, O'Neill S. The effect on clinical outcomes when targeting spinal manipulation at stiffness or pain sensitivity: a randomized trial. *Sci Rep.* 2020;10(1):14615. <https://doi.org/10.1038/s41598-020-71557-y> PMID: [32884045](#)
52. Yoshida R, Ichikawa K, Nagahori H, Tazawa T, Kuruma H. Effect of thoracic manipulation on neck pain in the mobility group: a randomized controlled trial. *Health Sci Rep.* 2024;7(9):e70031. <https://doi.org/10.1002/hsr2.70031> PMID: [39221059](#)
53. Cramer GD, Ross K, Raju PK, Cambron J, Cantu JA, Bora P, et al. Quantification of cavitation and gapping of lumbar zygapophyseal joints during spinal manipulative therapy. *J Manip Physiol Ther.* 2012;35(8):614–21. <https://doi.org/10.1016/j.jmpt.2012.06.007> PMID: [22902194](#)
54. Pagé I, Descarreaux M. Effects of spinal manipulative therapy biomechanical parameters on clinical and biomechanical outcomes of participants with chronic thoracic pain: a randomized controlled experimental trial. *BMC Musculoskelet Disord.* 2019;20(1):29. <https://doi.org/10.1186/s12891-019-2408-4> PMID: [30658622](#)
55. Serra-Añó P, Venegas W, Page A, Inglés de la Torre M, Aguilar-Rodríguez M, Espí-López G. Immediate effects of a single session of cervical spine manipulation on cervical movement patterns in people with nonspecific neck pain: a randomized controlled trial. *J Manipulative Physiol Ther.* 2023;46(1):17–26. <https://doi.org/10.1016/j.jmpt.2023.05.006> PMID: [37422751](#)
56. Arjona Retamal JJ, Fernández Seijo A, Torres Cintas JD, de-la-Llave-Rincón AI, Caballero Bragado A. Effects of instrumental, manipulative and soft tissue approaches for the suboccipital region in subjects with chronic mechanical neck pain. A randomized controlled trial. *Int J Environ Res Public Health.* 2021;18(16):8636. <https://doi.org/10.3390/ijerph18168636> PMID: [34444389](#)
57. Cassidy JD, Lopes AA, Yong-Hing K. The immediate effect of manipulation versus mobilization on pain and range of motion in the cervical spine: a randomized controlled trial. *J Manipulative Physiol Ther.* 1992;15(9):570–5.
58. Gómez F, Escribá P, Oliva-Pascual-Vaca J, Méndez-Sánchez R, Puente-González AS. Immediate and short-term effects of upper cervical high-velocity, low-amplitude manipulation on standing postural control and cervical mobility in chronic nonspecific neck pain: a randomized controlled trial. *J Clin Med.* 2020;9(8):2580. <https://doi.org/10.3390/jcm9082580> PMID: [32784959](#)
59. Gorrell LM, Beath K, Engel RM. Manual and instrument applied cervical manipulation for mechanical neck pain: a randomized controlled trial. *J Manipulative Physiol Ther.* 2016;39(5):319–29. <https://doi.org/10.1016/j.jmpt.2016.03.003> PMID: [27180949](#)
60. Martínez-Segura R, Fernández-de-las-Peñas C, Ruiz-Sáez M, López-Jiménez C, Rodríguez-Blanco C. Immediate effects on neck pain and active range of motion after a single cervical high-velocity low-amplitude manipulation in subjects presenting with mechanical neck pain: a randomized controlled trial. *J Manipulative Physiol Ther.* 2006;29(7):511–7. <https://doi.org/10.1016/j.jmpt.2006.06.022> PMID: [16949939](#)
61. Erdem EU, Ünver B, Akbas E, Kinikli GI. Immediate effects of thoracic manipulation on cervical joint position sense in individuals with mechanical neck pain: a randomized controlled trial. *J Back Musculoskelet Rehabil.* 2021;34(5):735–43. <https://doi.org/10.3233/BMR-191798> PMID: [33896804](#)
62. Hanney WJ, Puentedura EJ, Kolber MJ, Liu X, Pabian PS, Cheatham SW. The immediate effects of manual stretching and cervicothoracic junction manipulation on cervical range of motion and upper trapezius pressure pain thresholds. *J Back Musculoskelet Rehabil.* 2017;30(5):1005–13. <https://doi.org/10.3233/BMR-169573> PMID: [28505955](#)
63. Nambi G, Kamal W, Es S, Joshi S, Trivedi P. Spinal manipulation plus laser therapy versus laser therapy alone in the treatment of chronic non-specific low back pain: a randomized controlled study. *Eur J Phys Rehabil Med.* 2018;54(6):880–9. <https://doi.org/10.23736/S1973-9087.18.05005-0> PMID: [29687966](#)
64. Akgüller T, Coşkun R, Analay Akbaba Y. Comparison of the effects of cervical thrust manipulation and exercise in mechanical neck pain: a randomized controlled trial. *Physiother Theory Pract.* 2024;40(4):789–803. <https://doi.org/10.1080/09593985.2022.2164475> PMID: [36637358](#)
65. Ouseley BR, Parkin-Smith GF. Possible effects of chiropractic spinal manipulation and mobilization in the treatment of chronic tension-type headache: a pilot study. *Eur J Chiroprac.* 2002;50:3–13.

66. Reynolds B, Puentedura EJ, Kolber MJ, Cieland JA. Effectiveness of cervical spine high- velocity, low-amplitude thrust added to behavioral education, soft tissue mobilization, and exercise for people with temporomandibular disorder With Myalgia: A randomized clinical trial. *J Orthop Sports Phys Ther.* 2020;50(8):455–65. <https://doi.org/10.2519/jospt.2020.9175> PMID: [145231531](https://pubmed.ncbi.nlm.nih.gov/30955909/).
67. Passmore SR, Johnson MG, Aloraini SM, Cooper S, Aziz M, Glazebrook CM. Impact of spinal manipulation on lower extremity motor control in lumbar spinal stenosis patients: a small-scale assessor-blind randomized clinical trial. *J Manipulative Physiol Ther.* 2019;42(1):23–33. <https://doi.org/10.1016/j.jmpt.2018.10.002> PMID: [30955909](https://pubmed.ncbi.nlm.nih.gov/30955909/)
68. González-Iglesias J, Fernández-de-las-Peñas C, Cleland JA, Gutiérrez-Vega M del R. Thoracic spine manipulation for the management of patients with neck pain: a randomized clinical trial. *J Orthop Sports Phys Ther.* 2009;39(1):20–7. <https://doi.org/10.2519/jospt.2009.2914> PMID: [19209478](https://pubmed.ncbi.nlm.nih.gov/19209478/)
69. Puntumetakul R, Suvannnato T, Werasinghe P, Uthairat S, Yamauchi J, Boucaut R. Acute effects of single and multiple level thoracic manipulations on chronic mechanical neck pain: a randomized controlled trial. *Neuropsychiatr Dis Treat.* 2015;11:137–44. <https://doi.org/10.2147/NDT.S69579> PMID: [25624764](https://pubmed.ncbi.nlm.nih.gov/25624764/)
70. Heneghan NR, Rushton A. Understanding why the thoracic region is the 'Cinderella' region of the spine. *Man Ther.* 2016;21:274–6. <https://doi.org/10.1016/j.math.2015.06.010> PMID: [26189592](https://pubmed.ncbi.nlm.nih.gov/26189592/).
71. Cleland JA, Childs JD, McRae M, Palmer JA, Stowell T. Immediate effects of thoracic manipulation in patients with neck pain: a randomized clinical trial. *Man Ther.* 2005;10(2):127–35. <https://doi.org/10.1016/j.math.2004.08.005> PMID: [15922233](https://pubmed.ncbi.nlm.nih.gov/15922233/)
72. Norlander S, Aste-Norlander U, Nordgren B, Sahlstedt B. Mobility in the cervico-thoracic motion segment: an indicative factor of musculo-skeletal neck-shoulder pain. *Scand J Rehabil Med.* 1996;28(4):183–92. <https://doi.org/10.2340/165019771996183192> PMID: [9122645](https://pubmed.ncbi.nlm.nih.gov/9122645/)
73. Norlander S, Gustavsson BA, Lindell J, Nordgren B. Reduced mobility in the cervico-thoracic motion segment—a risk factor for musculoskeletal neck-shoulder pain: a two-year prospective follow-up study. *Scand J Rehabil Med.* 1997;29(3):167–74. <https://doi.org/10.2340/165019771997167174> PMID: [9271151](https://pubmed.ncbi.nlm.nih.gov/9271151/)
74. Norlander S, Nordgren B. Clinical symptoms related to musculoskeletal neck-shoulder pain and mobility in the cervico-thoracic spine. *Scand J Rehabil Med.* 1998;30(4):243–51. <https://doi.org/10.1080/003655098443995> PMID: [9825389](https://pubmed.ncbi.nlm.nih.gov/9825389/)
75. Jun P, Pagé I, Vette A, Kawchuk G. Potential mechanisms for lumbar spinal stiffness change following spinal manipulative therapy: a scoping review. *Chiropr Man Therap.* 2020;28(1):15. <https://doi.org/10.1186/s12998-020-00304-x> PMID: [32293493](https://pubmed.ncbi.nlm.nih.gov/32293493/)
76. Harsted S, Nyirö L, Downie A, Kawchuk GN, O'Neill S, Holm L, et al. Posterior to anterior spinal stiffness measured in a sample of 127 secondary care low back pain patients. *Clin Biomech (Bristol).* 2021;87:105408. <https://doi.org/10.1016/j.clinbiomech.2021.105408> PMID: [34157436](https://pubmed.ncbi.nlm.nih.gov/34157436/)
77. Owens EF Jr, DeVocht JW, Wilder DG, Gudavalli MR, Meeker WC. The reliability of a posterior-to-anterior spinal stiffness measuring system in a population of patients with low back pain. *J Manipulative Physiol Ther.* 2007;30(2):116–23. <https://doi.org/10.1016/j.jmpt.2006.12.006> PMID: [17320732](https://pubmed.ncbi.nlm.nih.gov/17320732/)
78. Vaillant M, Pickar JG, Kawchuk GN. Performance and reliability of a variable rate, force/displacement application system. *J Manipulative Physiol Ther.* 2010;33(8):585–93. <https://doi.org/10.1016/j.jmpt.2010.08.020> PMID: [21036280](https://pubmed.ncbi.nlm.nih.gov/21036280/)
79. Crocker TF, Lam N, Jordão M, Brundle C, Prescott M, Forster A, et al. Risk-of-bias assessment using Cochrane's revised tool for randomized trials (RoB 2) was useful but challenging and resource-intensive: observations from a systematic review. *J Clin Epidemiol.* 2023;161:39–45. <https://doi.org/10.1016/j.jclinepi.2023.06.015> PMID: [37364620](https://pubmed.ncbi.nlm.nih.gov/37364620/)
80. Minozzi S, Cinquini M, Gianola S, Gonzalez-Lorenzo M, Banzi R. The revised Cochrane risk of bias tool for randomized trials (RoB 2) showed low interrater reliability and challenges in its application. *J Clin Epidemiol.* 2020;126:37–44. <https://doi.org/10.1016/j.jclinepi.2020.06.015> PMID: [32562833](https://pubmed.ncbi.nlm.nih.gov/32562833/)
